# Supplementary material for: Clearance and transport of amyloid β by peripheral monocytes correlate with Alzheimer’s disease progression
Source: PubMed Central journal article supplement — Nat Commun. 2024 Sep 12;15:7998. doi: 10.1038/s41467-024-52396-1 (PMC11393069; doi:10.1038/s41467-024-52396-1), 2024-09-12
Supplement: 41467_2024_52396_MOESM1_ESM.pdf [file 41467_2024_52396_MOESM1_ESM.pdf]

# Supplementary Information

## Table of Contents

|                                                     |    |
|-----------------------------------------------------|----|
| <b>Part A. Supplementary figures</b> .....          | 2  |
| <b>Suppl. Fig. 1</b> .....                          | 2  |
| <b>Suppl. Fig. 2</b> .....                          | 4  |
| <b>Suppl. Fig. 3</b> .....                          | 6  |
| <b>Suppl. Fig. 4</b> .....                          | 8  |
| <b>Suppl. Fig. 5</b> .....                          | 10 |
| <b>Suppl. Fig. 6</b> .....                          | 12 |
| <b>Suppl. Fig. 7</b> .....                          | 14 |
| <b>Suppl. Fig. 8</b> .....                          | 16 |
| <b>Suppl. Fig. 9</b> .....                          | 18 |
| <b>Suppl. Fig. 10</b> .....                         | 20 |
| <b>Suppl. Fig. 11</b> .....                         | 22 |
| <b>Suppl. Fig. 12</b> .....                         | 24 |
| <b>Suppl. Fig. 13</b> .....                         | 26 |
| <b>Suppl. Fig. 14</b> .....                         | 28 |
| <b>Suppl. Fig. 15</b> .....                         | 30 |
| <b>Suppl. Fig. 16</b> .....                         | 32 |
| <b>Suppl. Fig. 17</b> .....                         | 34 |
| <b>Suppl. Fig. 18</b> .....                         | 36 |
| <b>Uncropped scan 1 for Suppl. Fig. 16</b> .....    | 38 |
| <b>Uncropped scan 2 for Suppl. Fig. 16</b> .....    | 39 |
| <b>Part B. Supplementary tables</b> .....           | 40 |
| <b>Suppl. Table 1</b> .....                         | 40 |
| <b>Suppl. Table 2</b> .....                         | 41 |
| <b>Suppl. Table 3</b> .....                         | 42 |
| <b>Suppl. Table 4</b> .....                         | 43 |
| <b>Part C. Flow cytometry gating strategy</b> ..... | 44 |
| <b>Part D. Antibody list for the study</b> .....    | 48 |

# Part A. Supplementary figures

Suppl. Fig. 1

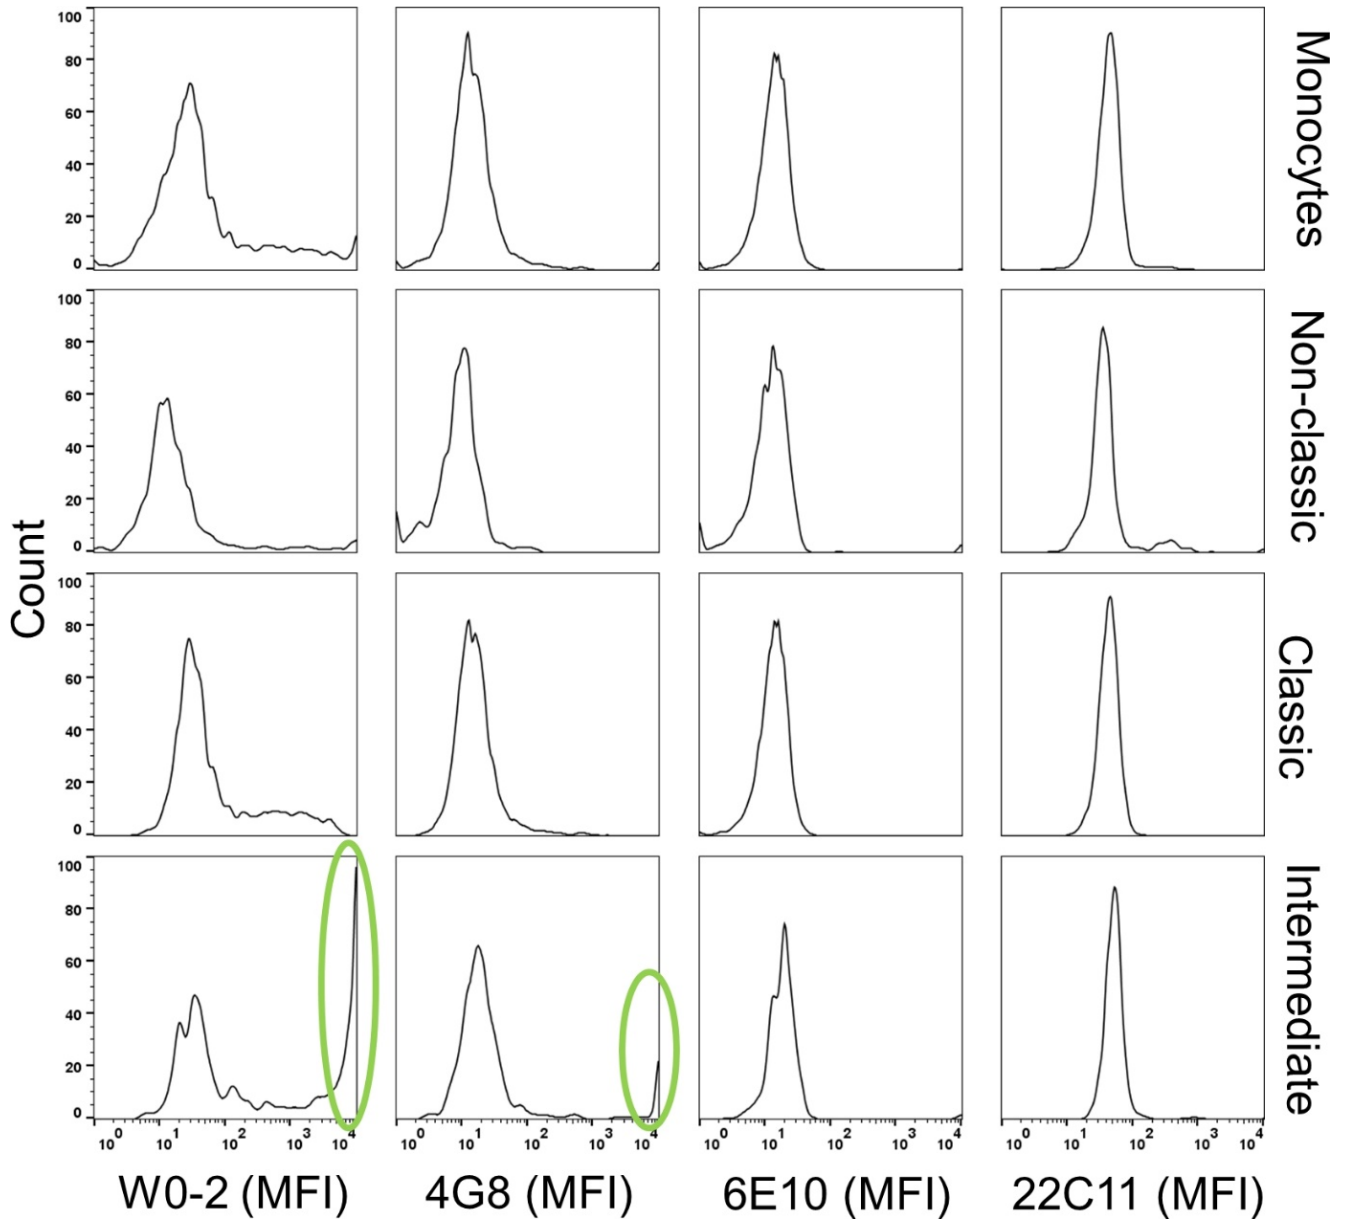

**Suppl. Fig. 1: Comparative analysis of anti-A $\beta$  monoclonal antibodies.** Several anti-human A $\beta$  monoclonal antibodies for their ability to identify A $\beta$ -binding monocytes in the six blood samples (3 CU, 2 MCI, and 1 AD-Dementia) were assessed using flow cytometry. The antibodies included clones W0-2, 4G8, and 6E10, with 22C11, an anti-APP antibody, serving as a control. Results showed that most monocytes in the blood did not carry A $\beta$ , with only a very small number showing A $\beta$  binding. Among the antibodies tested, W0-2 demonstrated the highest sensitivity, followed by 4G8 and 6E10. In contrast, 22C11 was unable to recognize A $\beta$  on the surface of monocytes.

Suppl. Fig. 2

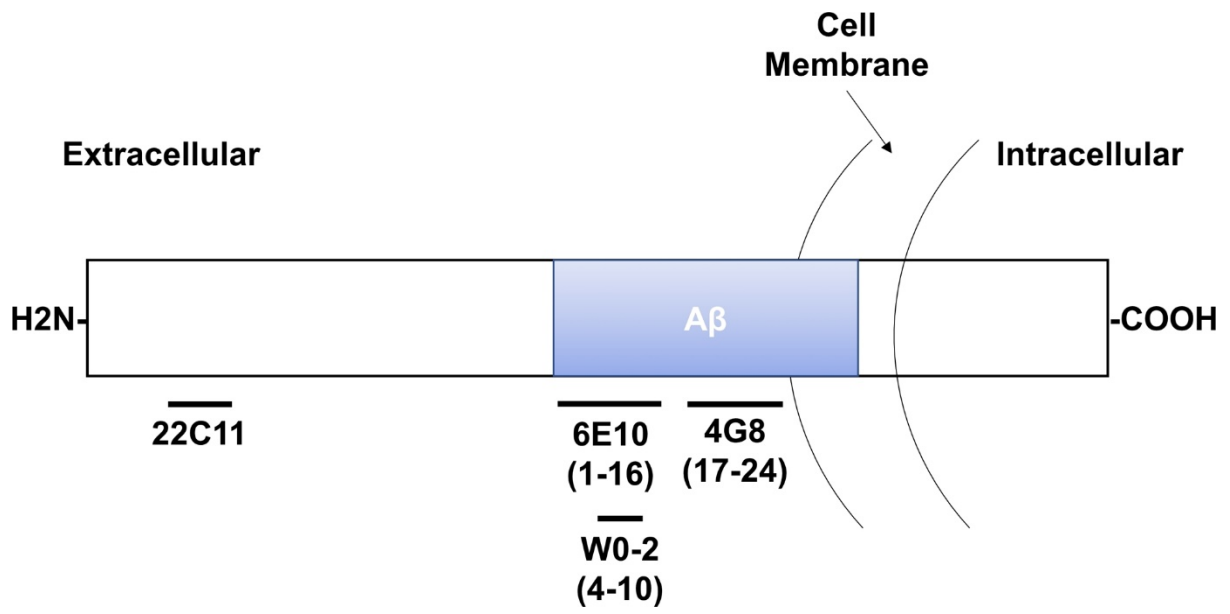

**Suppl. Fig. 2: Binding domains of anti-A $\beta$  monoclonal antibodies.**

Diagram illustrating the binding domains of the antibodies used in this study, including anti-A $\beta$  antibody W0-2, 6E10, and 4G8, which recognize amino acid residues (4-10), (1-16), and (17-24) of human A $\beta$ , respectively. Antibody clone 22C11 recognizes amino acids (66-81) of the N-terminus on the amyloid precursor protein (APP).

Suppl. Fig. 3

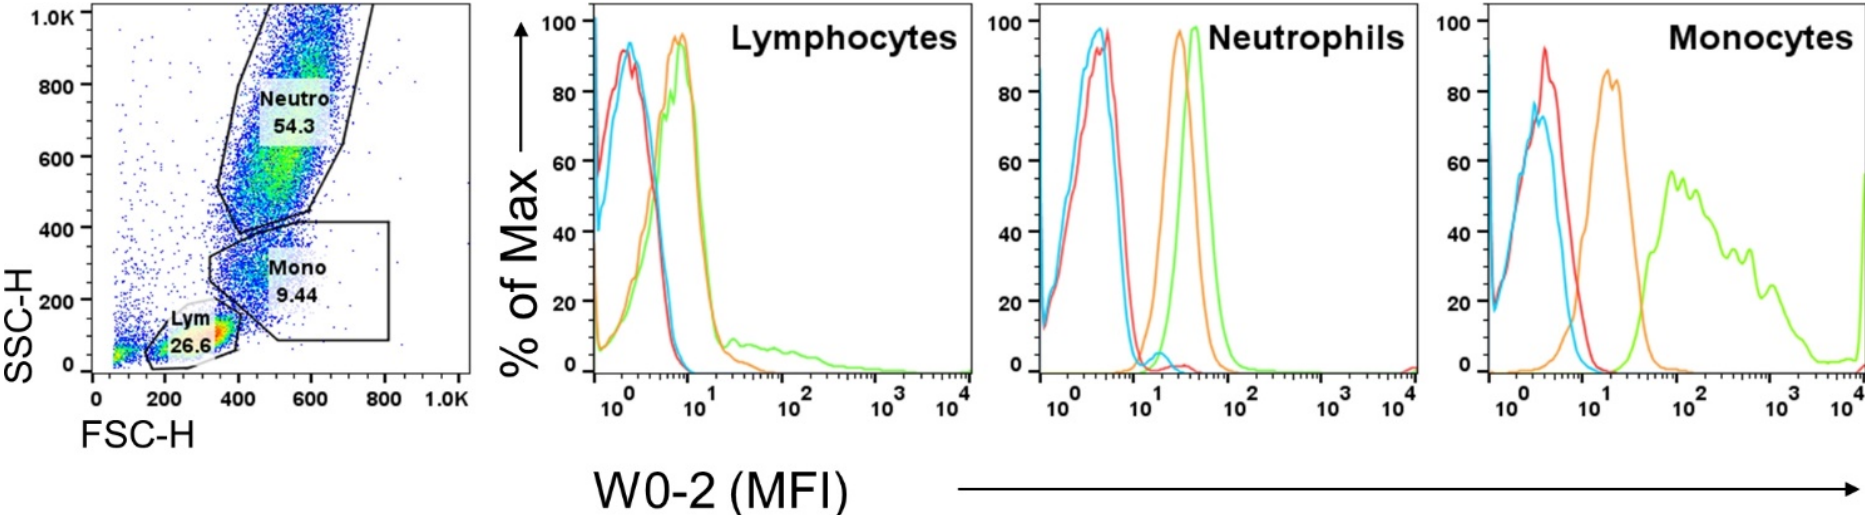

- Auto-fluorescence
- Isotype control
- Secondary antibody alone
- W0-2 and secondary

**Suppl. Fig. 3: Flow cytometry histograms of A $\beta$  peptide binding on human blood leukocytes.** Typical flow cytometry histograms showing fluorescence intensity of the W0-2 and secondary antibody (% of Max), proportional to A $\beta$  levels on cell surfaces after A $\beta$  peptide binding by human blood leukocytes. Monocytes exhibited substantial A $\beta$  peptide binding (n=6 blood samples, all CU), confirming A $\beta$  peptide presence on monocyte cell surfaces.

Suppl. Fig. 4

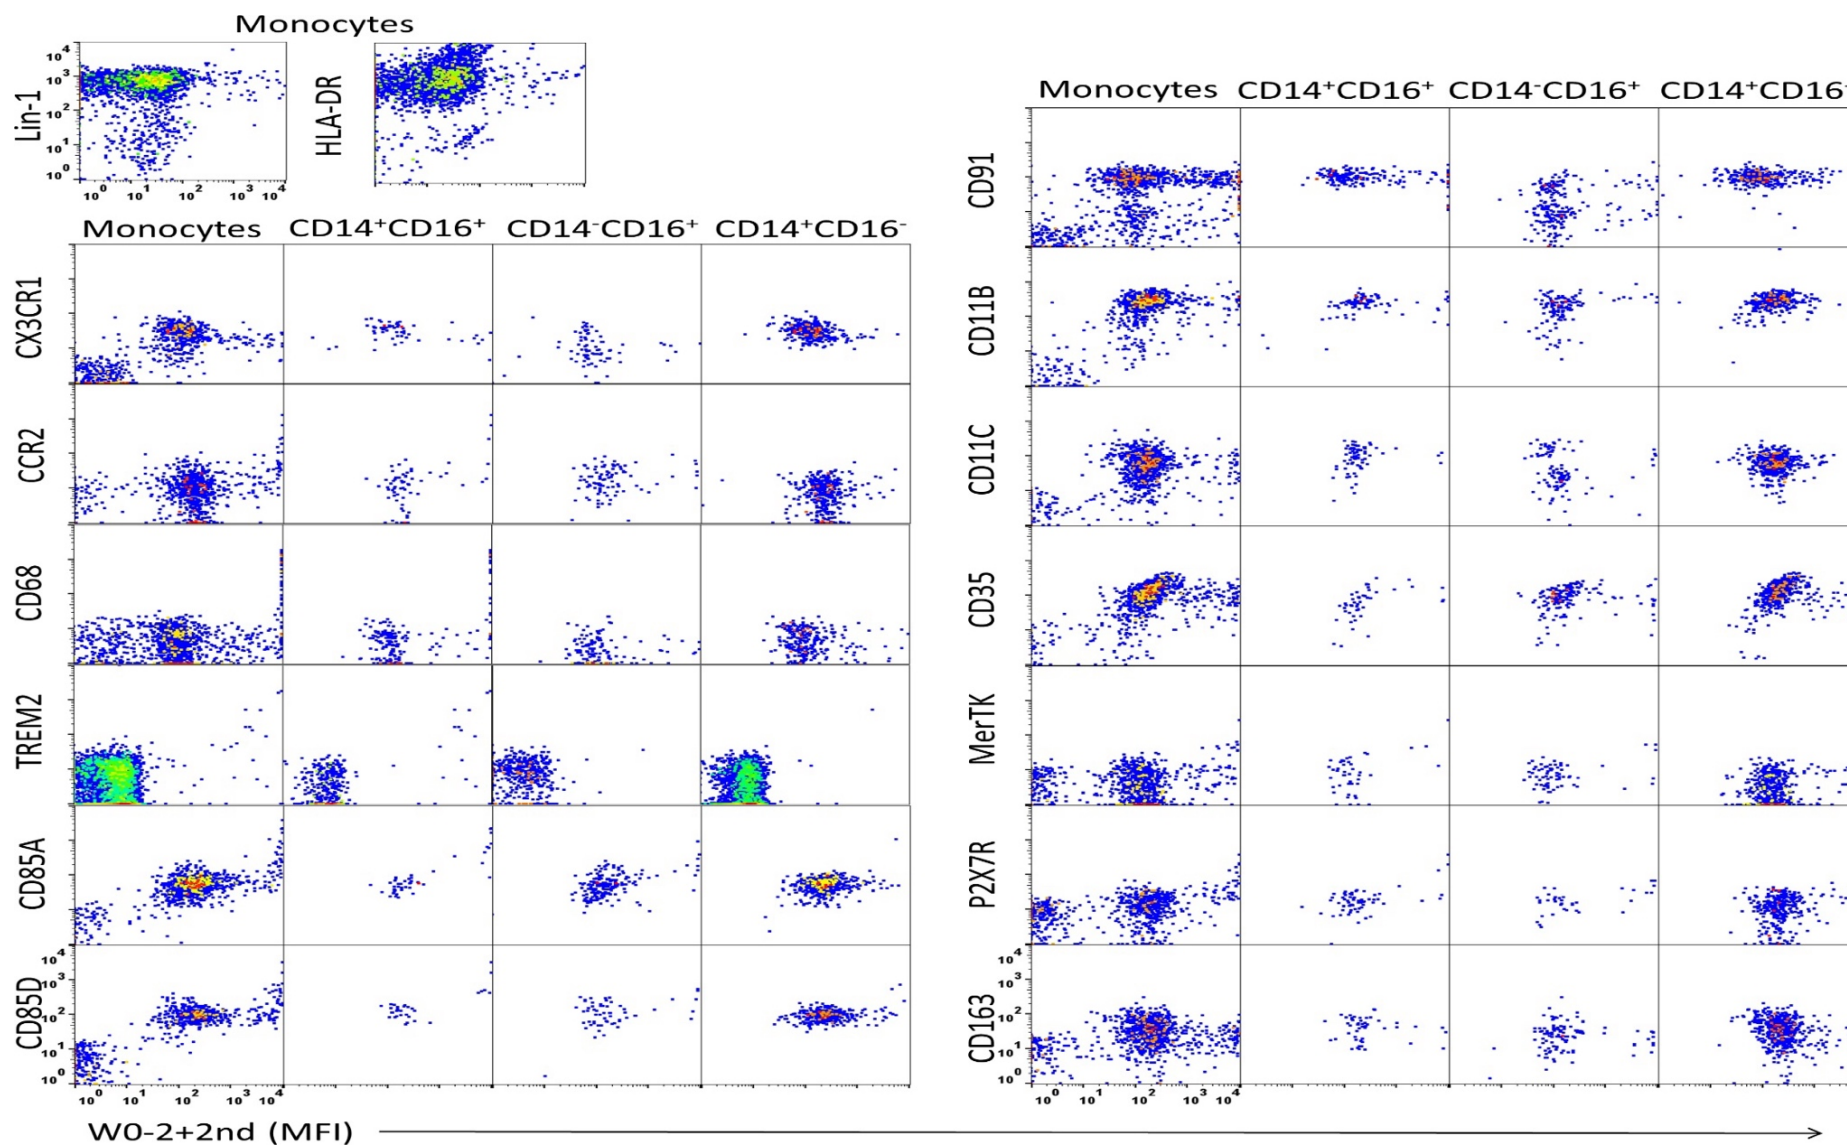



**Suppl. Fig. 4:** Examining immune phenotyping characteristics of A $\beta$ -binding monocyte subsets. Peripheral blood monocytes were initially gated based on forward and side scatter characteristics and further categorized according to the fluorescent intensity of CD14 and CD16. The A $\beta$ -binding monocyte subsets were analyzed using four-color immunophenotypic analysis ( $n \geq 3$ , with a total of 22 blood samples analyzed). It is worth noting that in the four-color panel for TREM2, what matches TREM2, CD14, and CD16 was Qdot525 conjugated W0-2, not W0-2 plus secondary antibody. Across all biomarkers examined, the A $\beta$ -binding monocytes within the three subsets exhibited similar immune phenotyping characteristics.

Suppl. Fig. 5

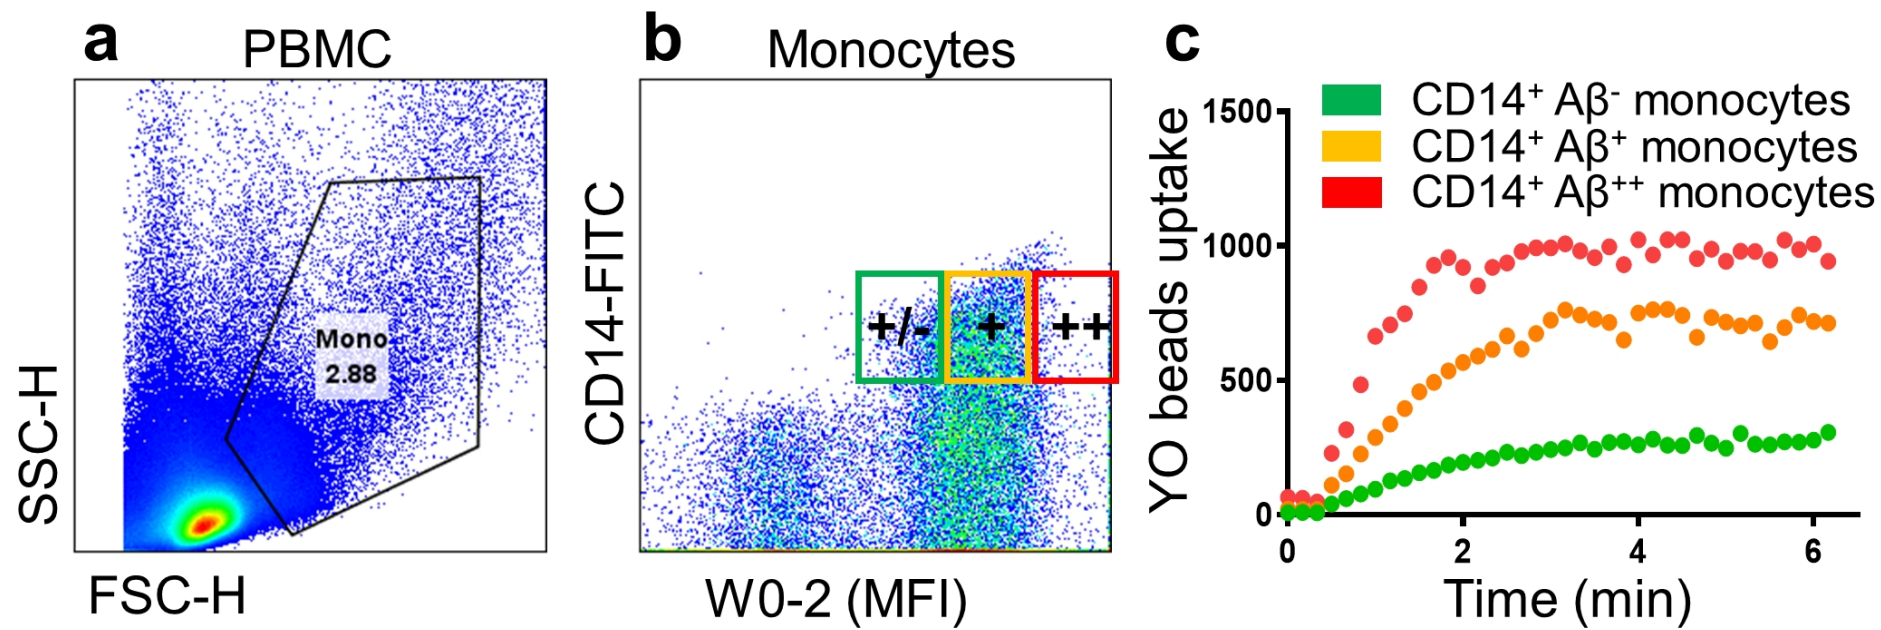

**Suppl. Fig. 5:** Phagocytic activity of monocytes in relation to surface A $\beta$  levels. To explore the link between surface A $\beta$  levels on monocytes and their phagocytic function, three PBMCs from 1 CU, 1 MCI, and 1 AD-dementia were stained with W0-2 and secondary antibodies, followed with CD14 antibody. a-b. CD14+ monocytes were categorized into A $\beta$ -, A $\beta$ +, and A $\beta$ ++ subsets based on their surface A $\beta$  levels. c. Phagocytic activity was assessed through real-time triple-color flow cytometry, measuring YO bead uptake. Results showed that CD14+A $\beta$ ++ monocytes exhibited the highest phagocytic activity, followed by CD14+A $\beta$ + monocytes, while CD14+A $\beta$ - monocytes had the lowest uptake of YO beads.

Suppl. Fig. 6

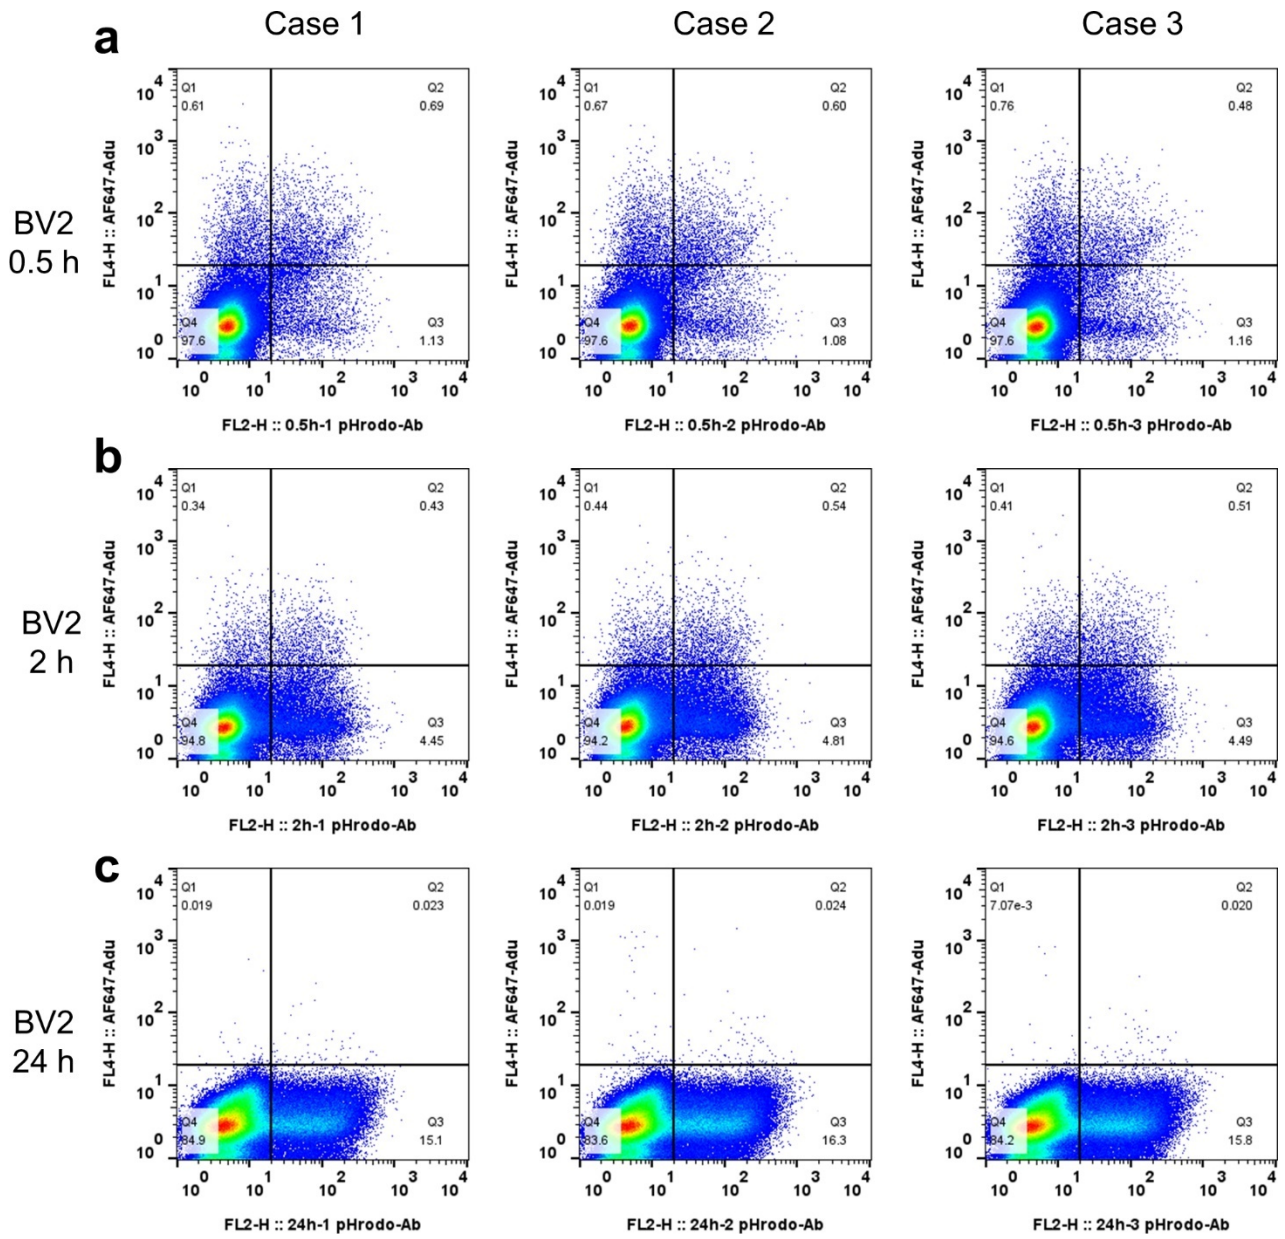

**Suppl. Fig. 6: Real-time monitoring of A $\beta$ <sub>1-42</sub> phagocytosis by microglia using a Two-Color Fluorescent Reporting System.** Real-time monitoring of A $\beta$ <sub>1-42</sub> phagocytosis by microglia using a Two-Color Fluorescent Reporting System. A Two-Color Fluorescent Reporting System was built to monitor the uptake of oA $\beta$ <sub>1-42</sub> by BV2 cells, utilizing AF647-conjugated Aducanumab (Adu) and pHrodo Red to visualize surface-bound and intra-lysosomal oA $\beta$ <sub>1-42</sub>. BV2 cells (n=3, in separate culture dishes) showed initial internalization of pHrodo-oA $\beta$ <sub>1-42</sub> at 0.5 hours (Q3 in panel **a**), while a large amount of pHrodo-oA $\beta$ <sub>1-42</sub> remained surface-bound (Q1 in panel **a**). BV2 cells showed substantial internalization of pHrodo-oA $\beta$ <sub>1-42</sub> at 2 hours (Q3 in panel **b**), with still a substantial amount of pHrodo-oA $\beta$ <sub>1-42</sub> surface-bound (Q1 in panel **b**). Most of the pHrodo-oA $\beta$ <sub>1-42</sub> had been internalized by BV2 cells at 24 hours (Q3 in panel **c**), while a minimal amount of pHrodo-oA $\beta$ <sub>1-42</sub> remained surface-bound (Q1 in panel **c**). Note that Q2 represents the BV2 cell subpopulation that has both surface-bound and internalized pHrodo-oA $\beta$ <sub>1-42</sub>.

Suppl. Fig. 7

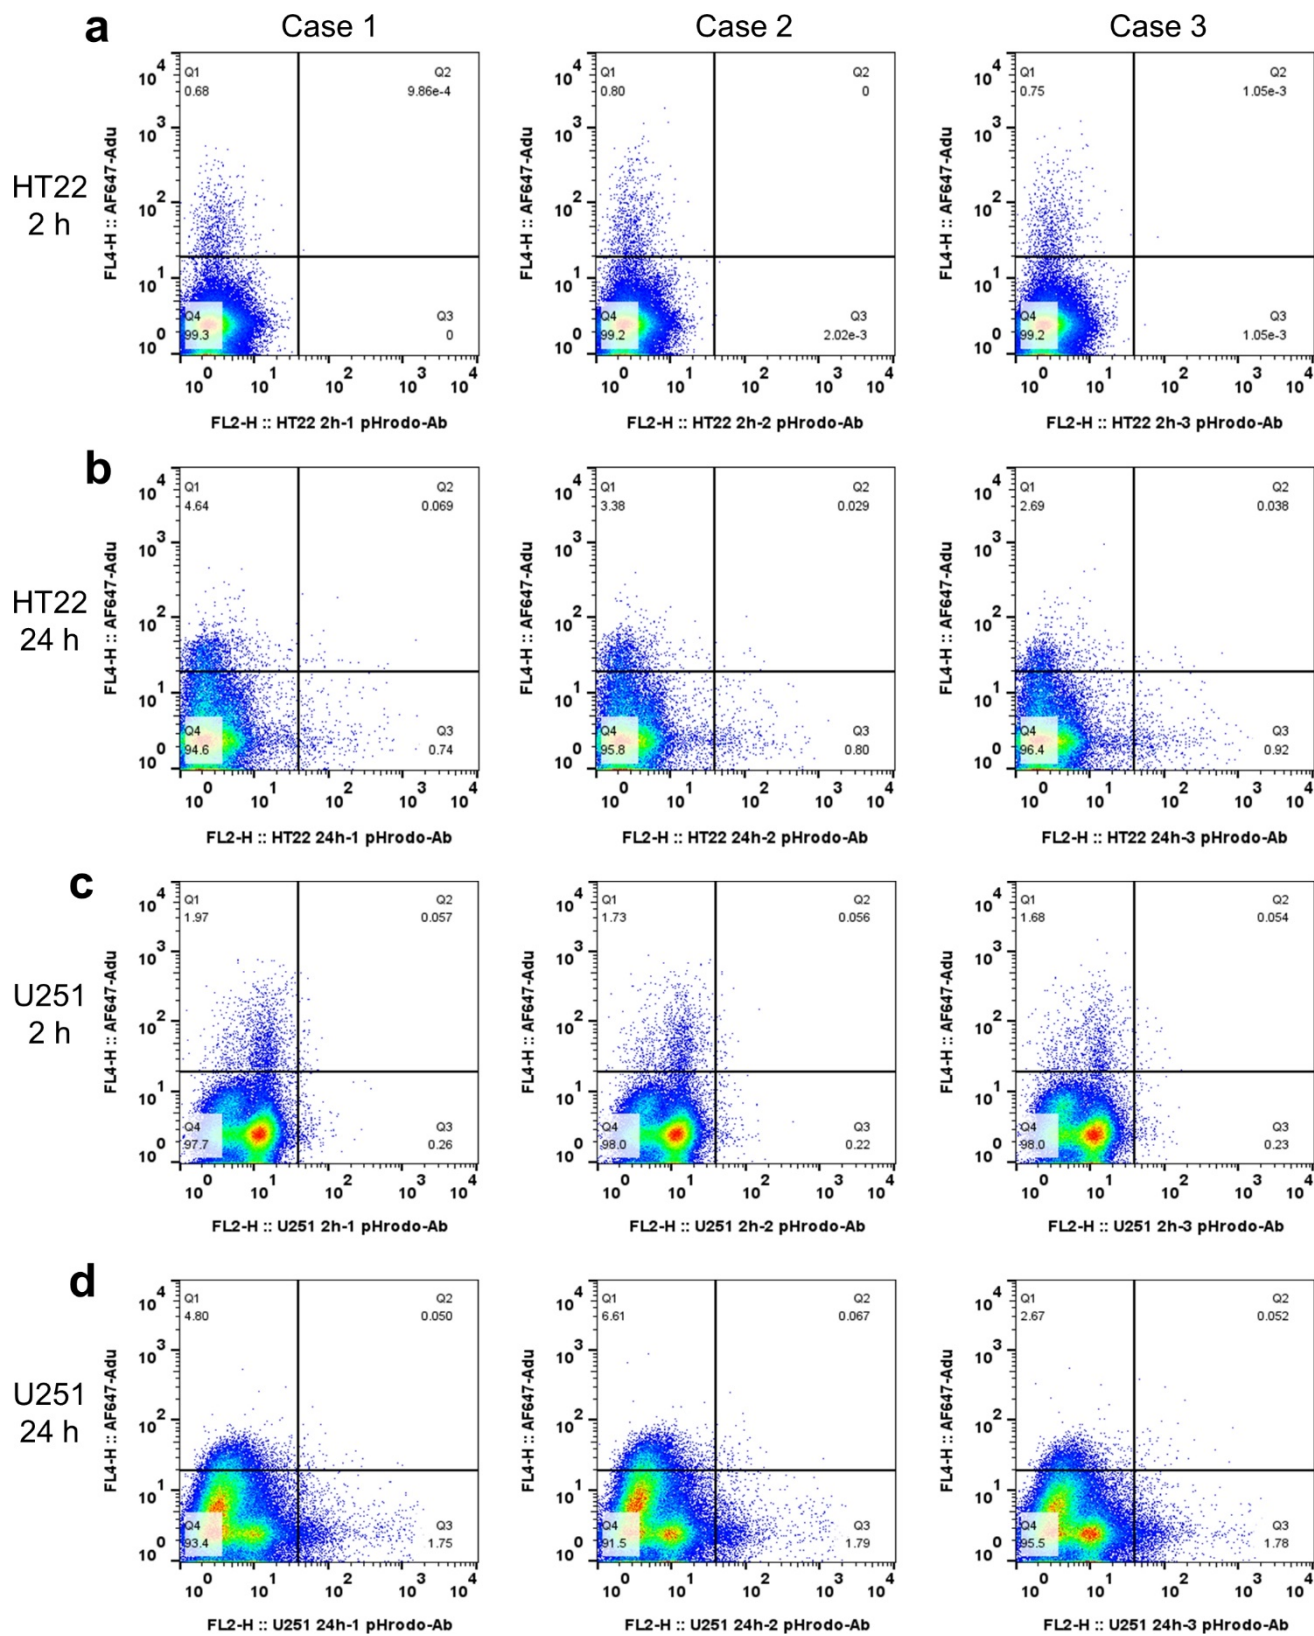

**Suppl. Fig. 7: Real-time monitoring of A $\beta$ <sub>1-42</sub> phagocytosis by neuronal and glial cells using a Two-Color Fluorescent Reporting System.** A Two-Color Fluorescent Reporting System was developed to monitor the uptake of oA $\beta$ <sub>1-42</sub> by HT22 and U251 cells, utilizing AF647-conjugated Aducanumab (Adu) and pHrodo Red to visualize surface-bound and intra-lysosomal oA $\beta$ <sub>1-42</sub>. Compared with BV2 cells, HT22 cells (n=3, in separate culture dishes) displayed surface adhesion without subsequent internalization after 2 hours (**a**) and showed weak internalization after 24 hours (**b**). In contrast, U251 cells (n=3, in separate culture dishes) exhibited surface adhesion with weak internalization after 2 hours (**c**), which became more apparent after 24 hours (**d**).



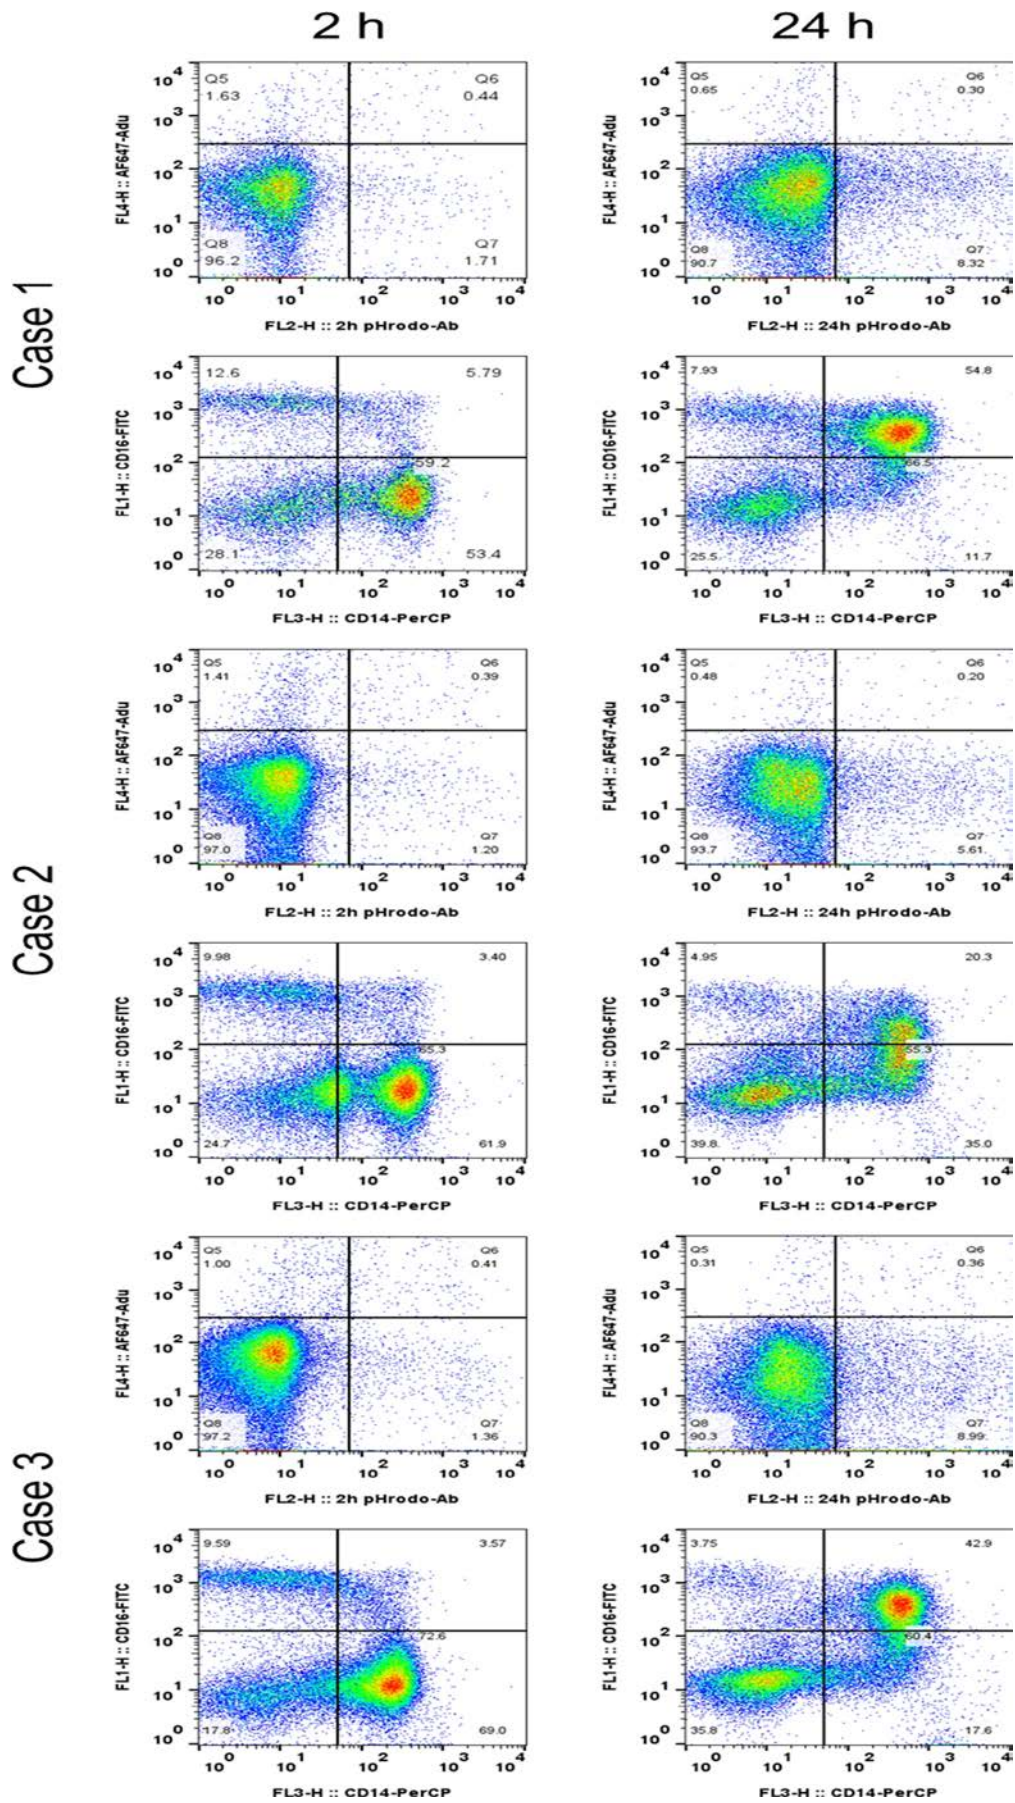



**Suppl. Fig. 8: Real-time monitoring of A $\beta$ <sub>1-42</sub> phagocytosis by monocytes using a Two-Color Fluorescent Reporting System.** Using AF647-conjugated Aducanumab (Adu) and pHrodo red to visualize surface-bound and intra-lysosomal oA $\beta$ <sub>1-42</sub>, a Two-Color Fluorescent Reporting System was built to monitor the uptake of oA $\beta$ <sub>1-42</sub> by monocytes. Human PBMCs, including monocytes from three individuals (1 CU, 1 MCI, and 1 AD-dementia), exhibited substantial internalization of pHrodo-oA $\beta$ <sub>1-42</sub> after 24 hours; Classic monocytes (CD14<sup>+</sup>CD16<sup>-</sup>) differentiated into intermediate monocytes (CD14<sup>+</sup>CD16<sup>+</sup>) after treatment, indicating a pro-inflammatory response.

Suppl. Fig. 9

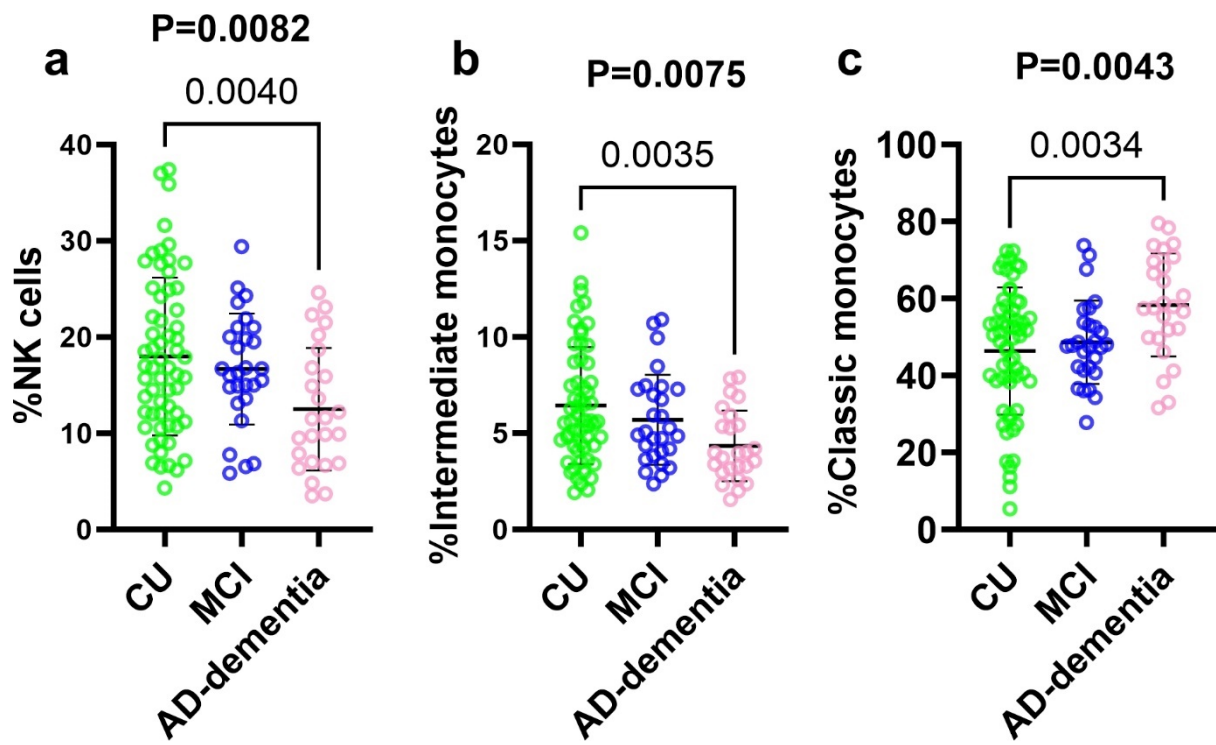

**Suppl. Fig. 9: Correlations between alterations in lymphocyte and monocytic subsets percentages and AD clinical stages.** Compared to CU (n=64), the percentages of NK cells (**a**) and CD14<sup>+</sup>CD16<sup>+</sup> intermediate monocytes (**b**) reduced in MCI/AD-dementia (n=25, 24). Conversely, the percentage of CD14<sup>+</sup>CD16<sup>-</sup> classical monocytes elevated in MCI/AD-dementia compared to CU (**c**). The column dot plots represent mean  $\pm$  standard deviation. The datasets were not normally distributed, and P values were determined using the Kruskal-Wallis test, followed by Dunn's multiple comparisons test (solid zig-zag line). Notably, a one-way ordinary ANOVA test was applied to %NK cells due to the normal distribution of the data.

Suppl. Fig. 10

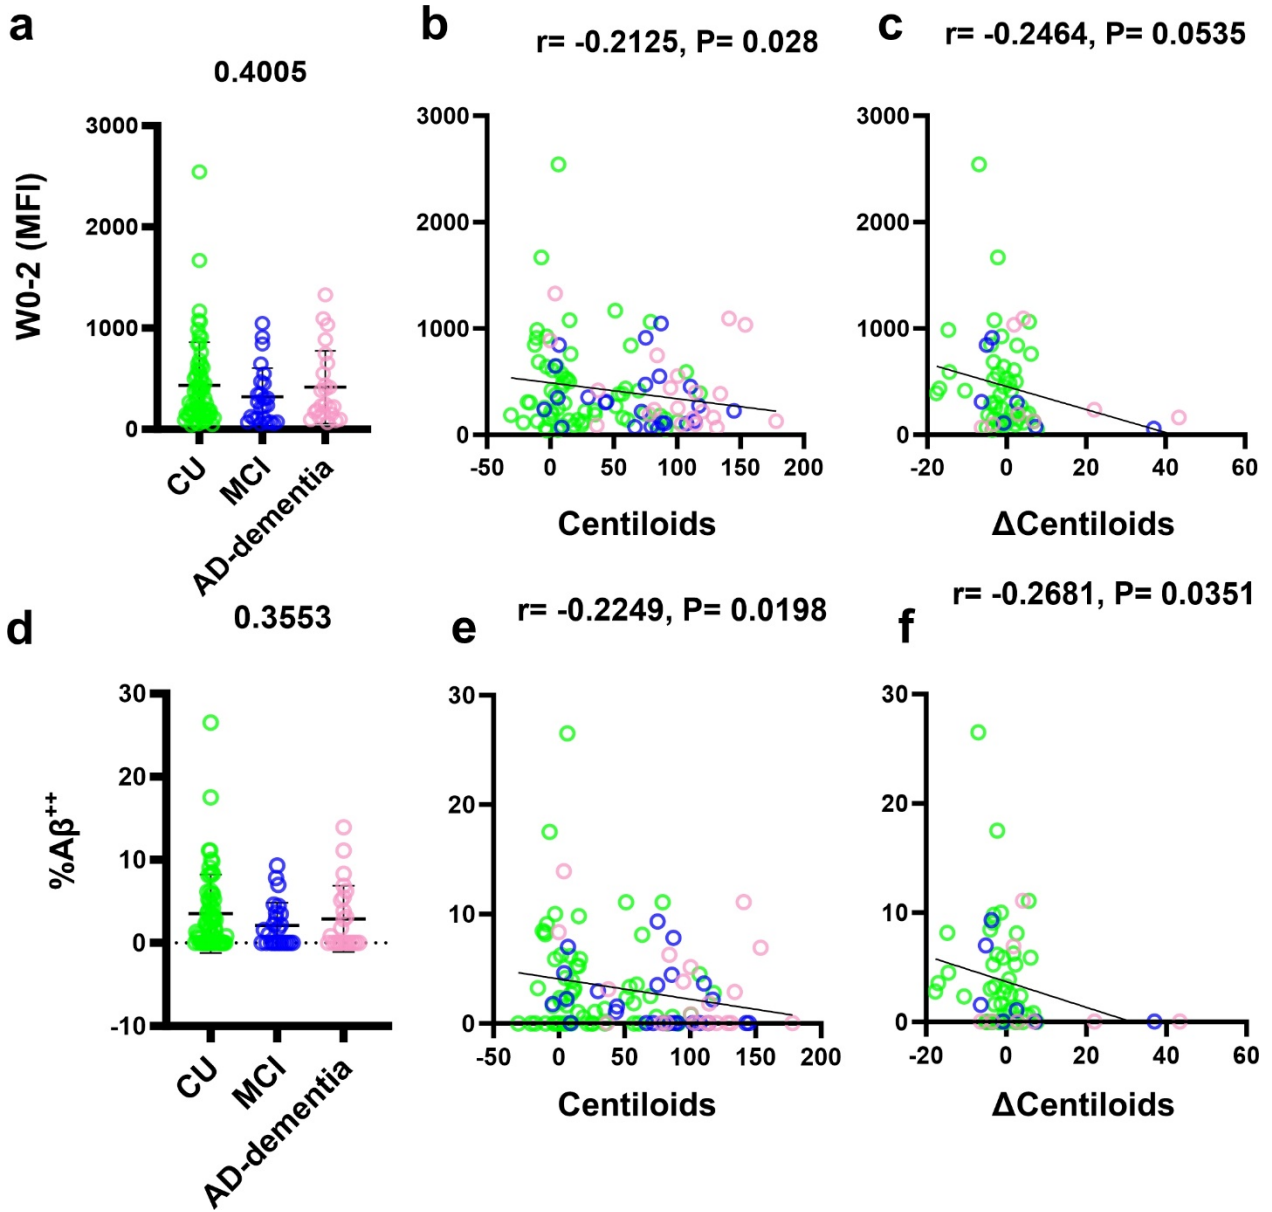

**Suppl. Fig. 10: Monocyte subset - Intermediate Monocyte - surface A $\beta$  and their associations with AD clinical stages, brain A $\beta$ -PET burden and annual progression of A $\beta$ -PET burden.** The relationship between intermediate monocyte surface A $\beta$  (including fluorescence intensity and the percentage of A $\beta^{++}$  monocytes) and the clinical stages of AD (**a & d**), brain A $\beta$ -PET burden (**b & e**) and the annual progression of brain A $\beta$ -PET burden ( $\Delta$ Centiloid, **c & f**) was investigated in 113 participants (64 CU, 25 MCI, and 24 AD-Dementia). The column dot plots illustrate the mean  $\pm$  standard deviation, and the P values were determined through the Kruskal-Wallis test followed by Dunn's multiple comparisons test (solid zig-zag line). If a test was not statistically significant, only the Kruskal-Wallis P value was shown. Correlation coefficients ( $r$ ) and P values were calculated using Spearman correlation analysis.

Suppl. Fig. 11

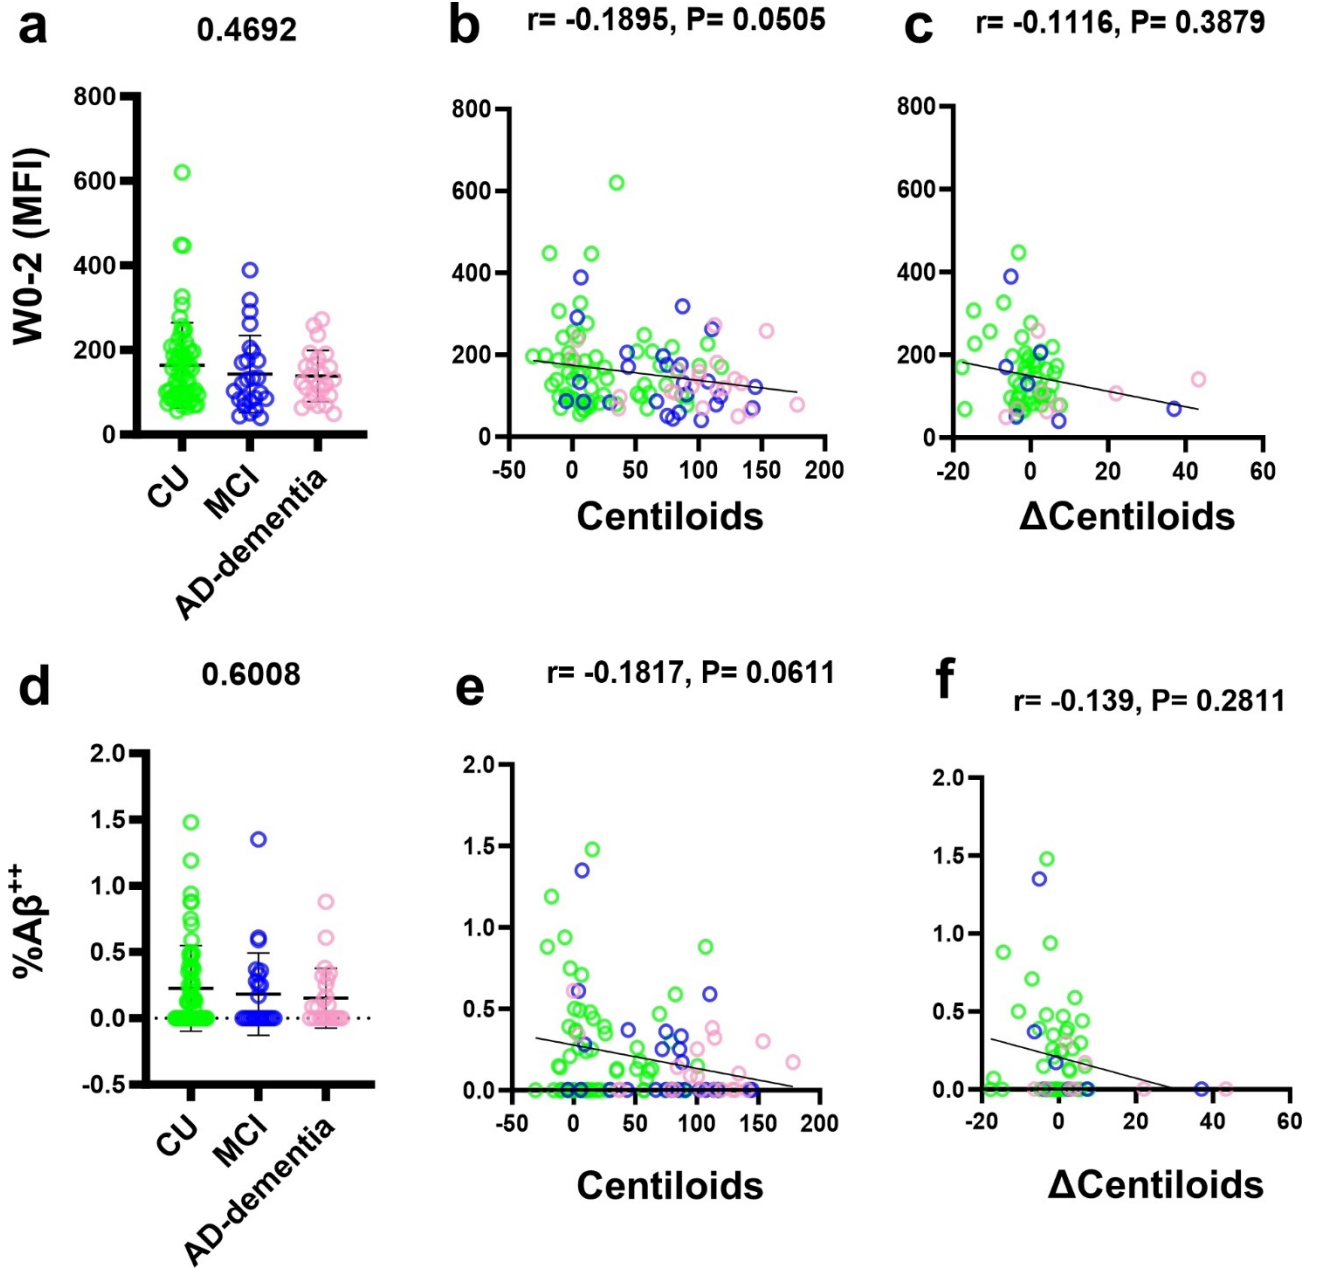

**Suppl. Fig. 11: Monocyte subset - Classic Monocyte - surface A $\beta$  and their associations with AD clinical stages, brain A $\beta$ -PET burden and annual progression of A $\beta$ -PET burden.** The relationship between classical monocyte surface A $\beta$  (including fluorescence intensity and the percentage of A $\beta^{++}$  monocytes) and the clinical stages of AD (**a** & **d**), brain A $\beta$ -PET burden (**b** & **e**) and the annual progression of brain A $\beta$ -PET burden ( $\Delta$ Centiloid, **c** & **f**) was investigated in 113 participants (64 CU, 25 MCI, and 24 AD-Dementia). The column dot plots illustrate the mean  $\pm$  standard deviation, and the P values were determined through the Kruskal-Wallis test followed by Dunn's multiple comparisons test (solid zig-zag line). If a test was not statistically significant, only the Kruskal-Wallis P value was shown. Correlation coefficients ( $r$ ) and P values were calculated using Spearman correlation analysis.

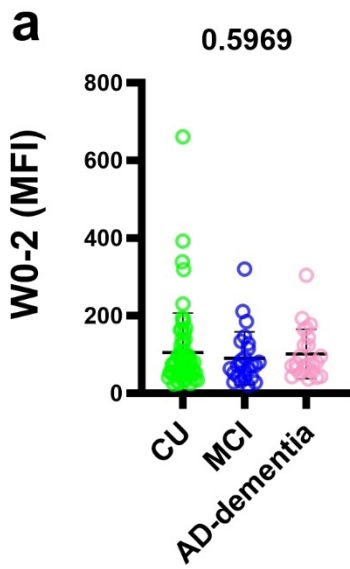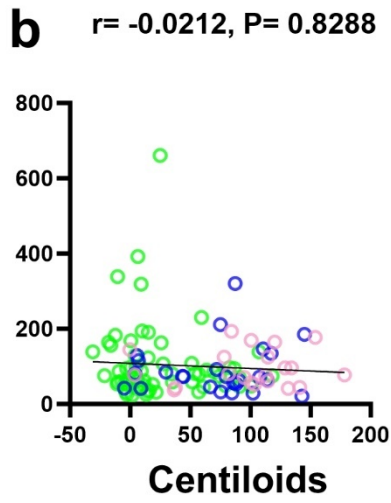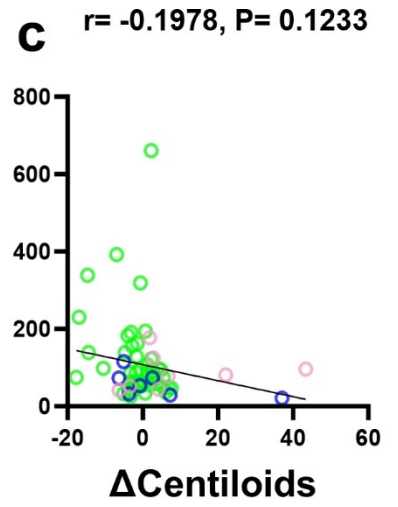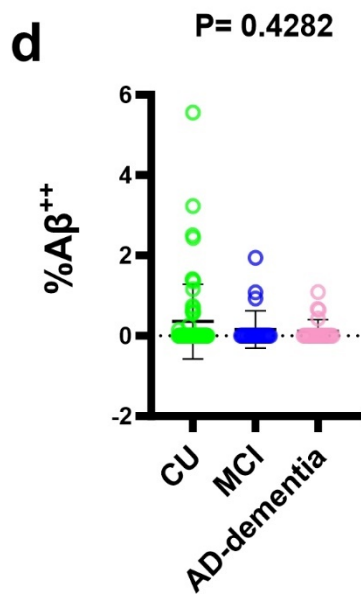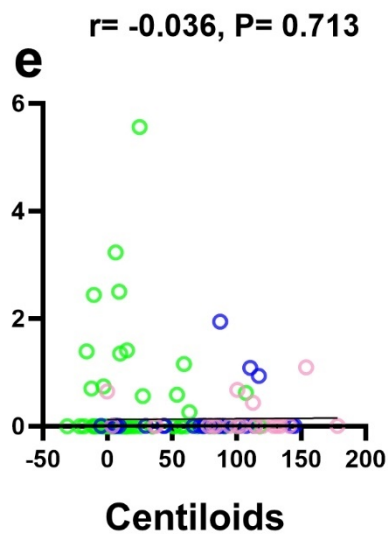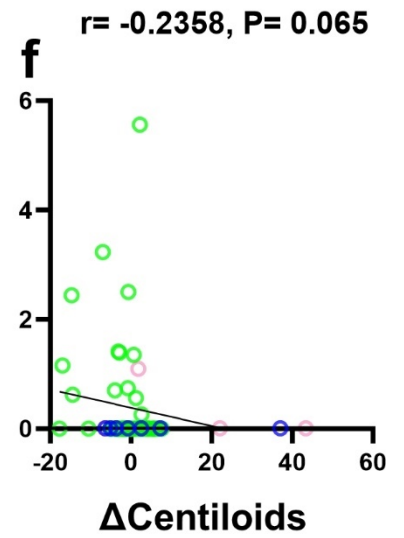



**Suppl. Fig. 12: Monocyte subset - Non-classic Monocyte - surface A $\beta$  and their associations with AD clinical stages, brain A $\beta$ -PET burden and annual progression of A $\beta$ -PET burden.** The relationship between non-classical monocyte surface A $\beta$  (including fluorescence intensity and the percentage of A $\beta^{++}$  monocytes) and the clinical stages of AD (**a & d**), brain A $\beta$ -PET burden (**b & e**) and the annual progression of brain A $\beta$ -PET burden ( $\Delta$ Centiloid, **c & f**) was investigated in 113 participants (64 CU, 25 MCI, and 24 AD-Dementia). The column dot plots illustrate the mean  $\pm$  standard deviation, and the P values were determined through the Kruskal-Wallis test followed by Dunn's multiple comparisons test (solid zig-zag line). If a test was not statistically significant, only the Kruskal-Wallis P value was shown. Correlation coefficients ( $r$ ) and P values were calculated using Spearman correlation analysis.

## Monocytes

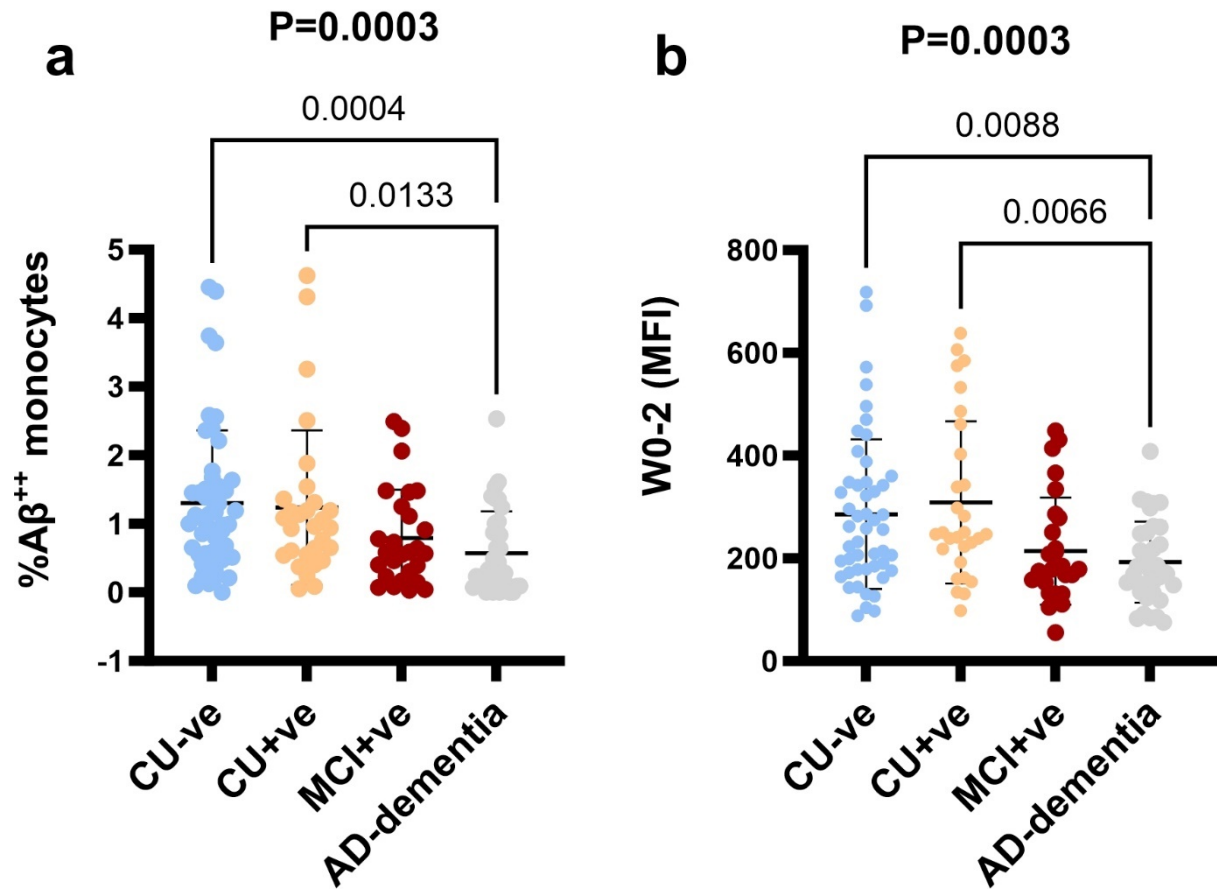

### **Suppl. Fig. 13: Monocyte surface A $\beta$ Changes in A $\beta$ -PET+ CU**

**Individuals.** CU individuals were compared based on brain A $\beta$ -PET status (CU-ve: n=49; CU+ve: n=29), MCI+ve (n=27), and AD-dementia (n=36), with exclusion of MCI-ve participants (n=9) from the comparison. **Panel a:** It was found that CU+ve individuals exhibited a lower percentage of A $\beta^{++}$  monocytes compared to CU-ve individuals, but the difference was not statistically significant. Additionally, slightly elevated surface A $\beta$  fluorescent intensity was observed in CU+ve compared to CU-ve individuals, but the difference was not statistically significant either, as shown in **Panel b**. The column dot plots represent mean  $\pm$  standard deviation. Group comparison was determined by Kruskal-Wallis test followed by Dunn's multiple comparisons test (solid zig-zag line). If a test was not statistically significant, only a Kruskal-Wallis P value was shown.

Suppl. Fig. 14

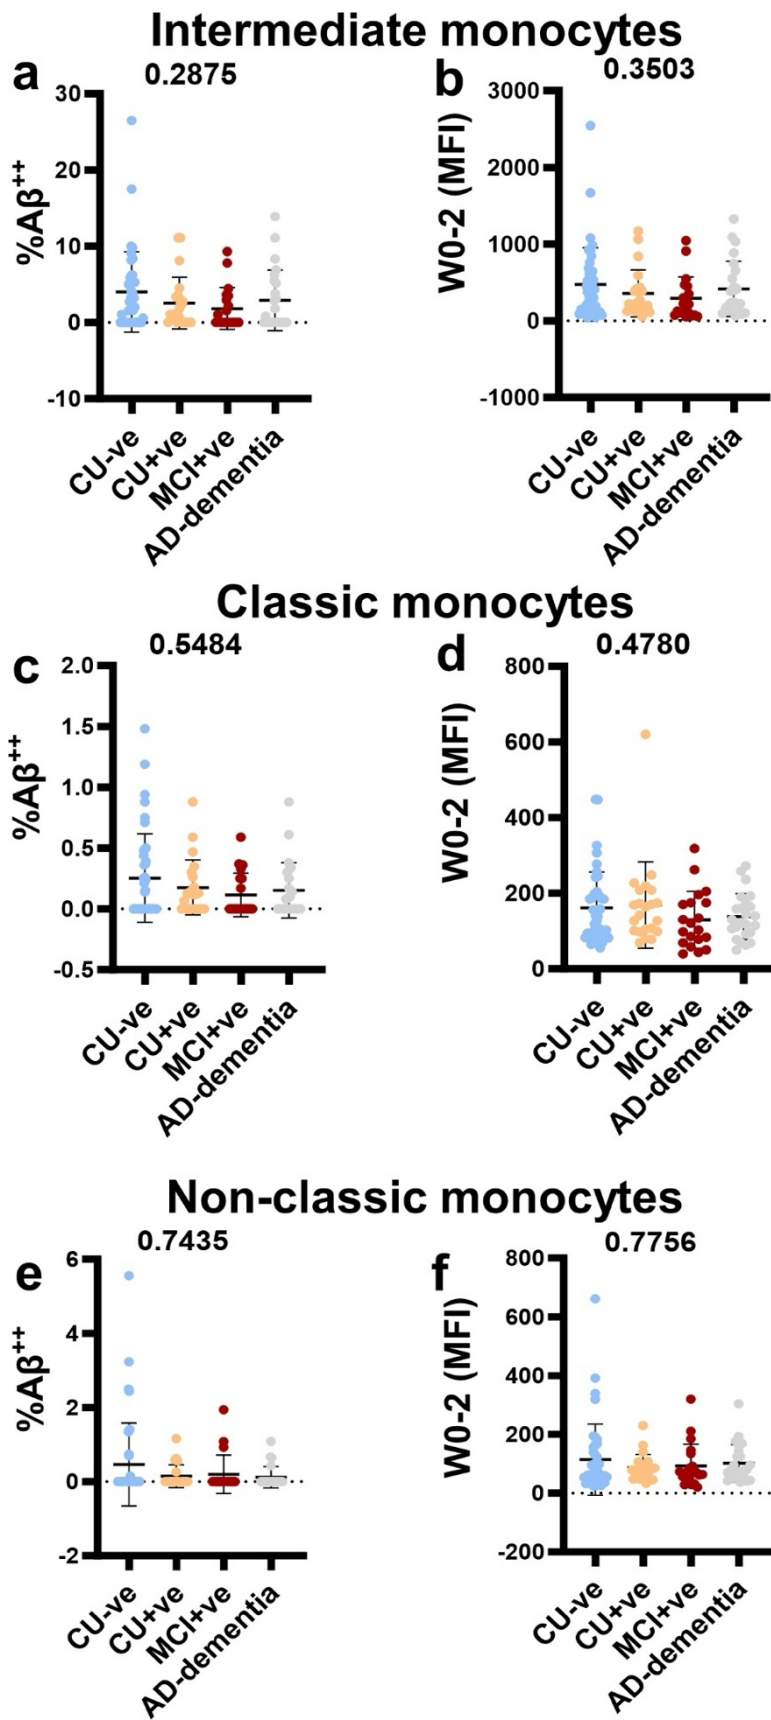

**Suppl. Fig. 14: Surface A $\beta$  Changes of monocytic subsets in A $\beta$ -PET+ CU Individuals.** CU individuals were compared based on brain A $\beta$ -PET status (CU-ve: n=49; CU+ve: n=29), MCI+ve (n=27), and AD-dementia (n=36), with exclusion of MCI-ve participants (n=9) from the comparison. The data is presented across three monocytic subsets.

**Panels a, c, e:** These panels demonstrate that CU+ve individuals have a lower percentage of A $\beta^{++}$  monocytes compared to CU-ve individuals, with the percentage being similar to that observed in MCI+ve and AD-dementia individuals. This trend is consistent across all three monocyte subsets. In contrast, **Panel d** shows that CU+ve individuals exhibit a slight elevation in surface A $\beta$  fluorescent intensity compared to CU-ve individuals within the classic monocyte subset. However, this increase in surface A $\beta$  fluorescent intensity is not observed in the CU+ve groups within the intermediate and non-classic monocyte subsets, as shown in **Panels b, f**. The column dot plots represent mean  $\pm$  standard deviation. Group comparison was determined by Kruskal-Wallis test followed by Dunn's multiple comparisons test (solid zig-zag line). If a test was not statistically significant, only a Kruskal-Wallis P value was shown.

Suppl. Fig. 15

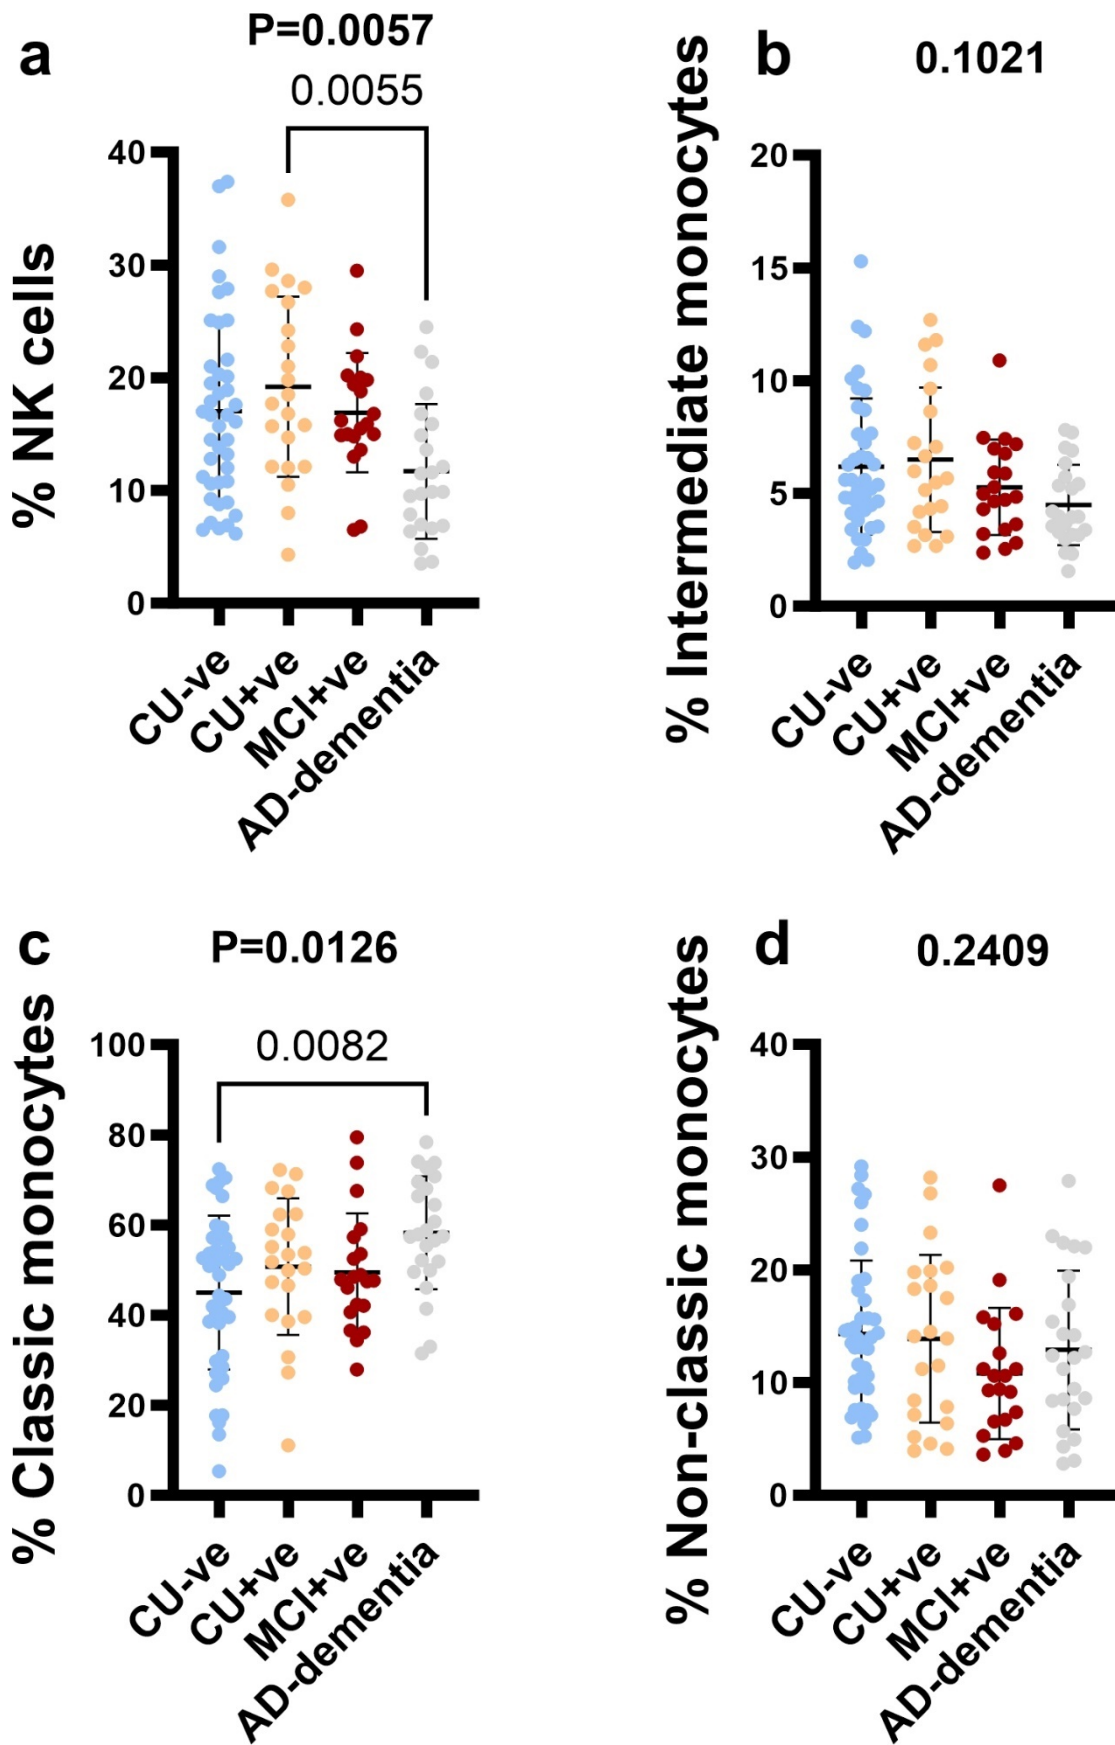

**Suppl. Fig. 15: Percentage Changes of NK Cells and Monocytic Subsets in A $\beta$ -PET+ CU Individuals.** CU individuals were compared based on brain A $\beta$ -PET status (CU-ve: n=49; CU+ve: n=29), MCI+ve (n=27), and AD-dementia (n=36), with exclusion of MCI-ve participants (n=9) from the comparison. **Panel a:** CU+ve individuals showed a higher percentage of NK cells than CU-ve individuals. **Panel c:** The percentage of classic monocytes is slightly elevated in CU+ve individuals compared to CU-ve individuals, but the difference is not statistically significant. **Panel b, d:** There are no apparent differences between CU+ve and CU-ve individuals in the percentage of intermediate monocytes or non-classic monocytes. The column dot plots represent mean  $\pm$  standard deviation. Group comparison was determined by Kruskal-Wallis test followed by Dunn's multiple comparisons test (solid zig-zag line). If a test was not statistically significant, only a Kruskal-Wallis P value was shown.

Suppl. Fig. 16

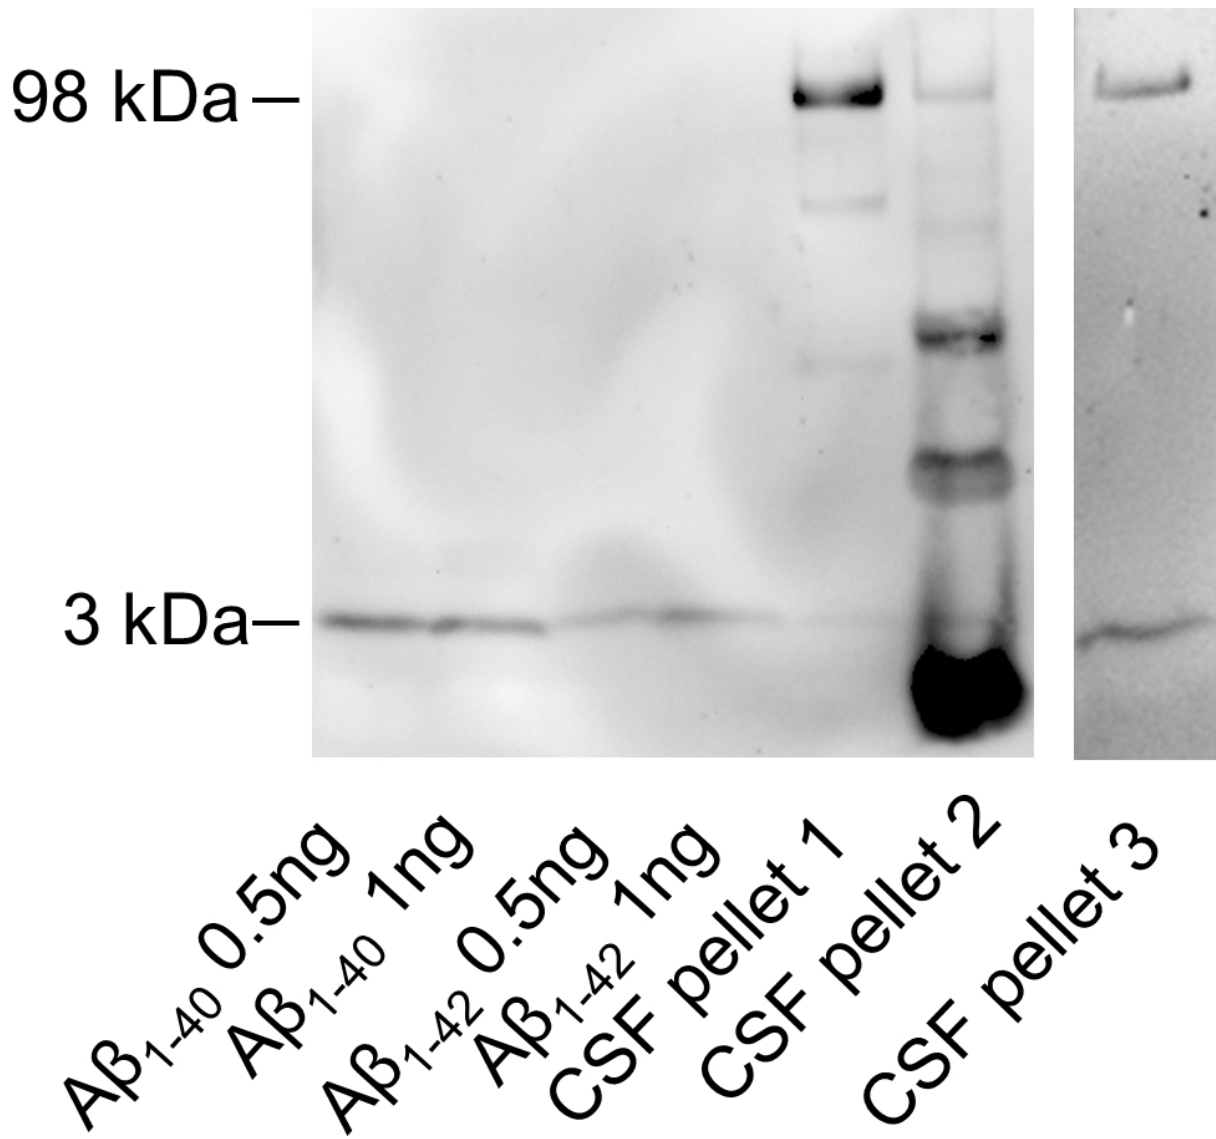



**Suppl. Fig. 16: Western blot detection of A $\beta$  peptides on CSF pellet cells.** Western blot demonstrated the presence of A $\beta$  peptides in three CSF pellet cell samples of two blots.

Suppl. Fig. 17

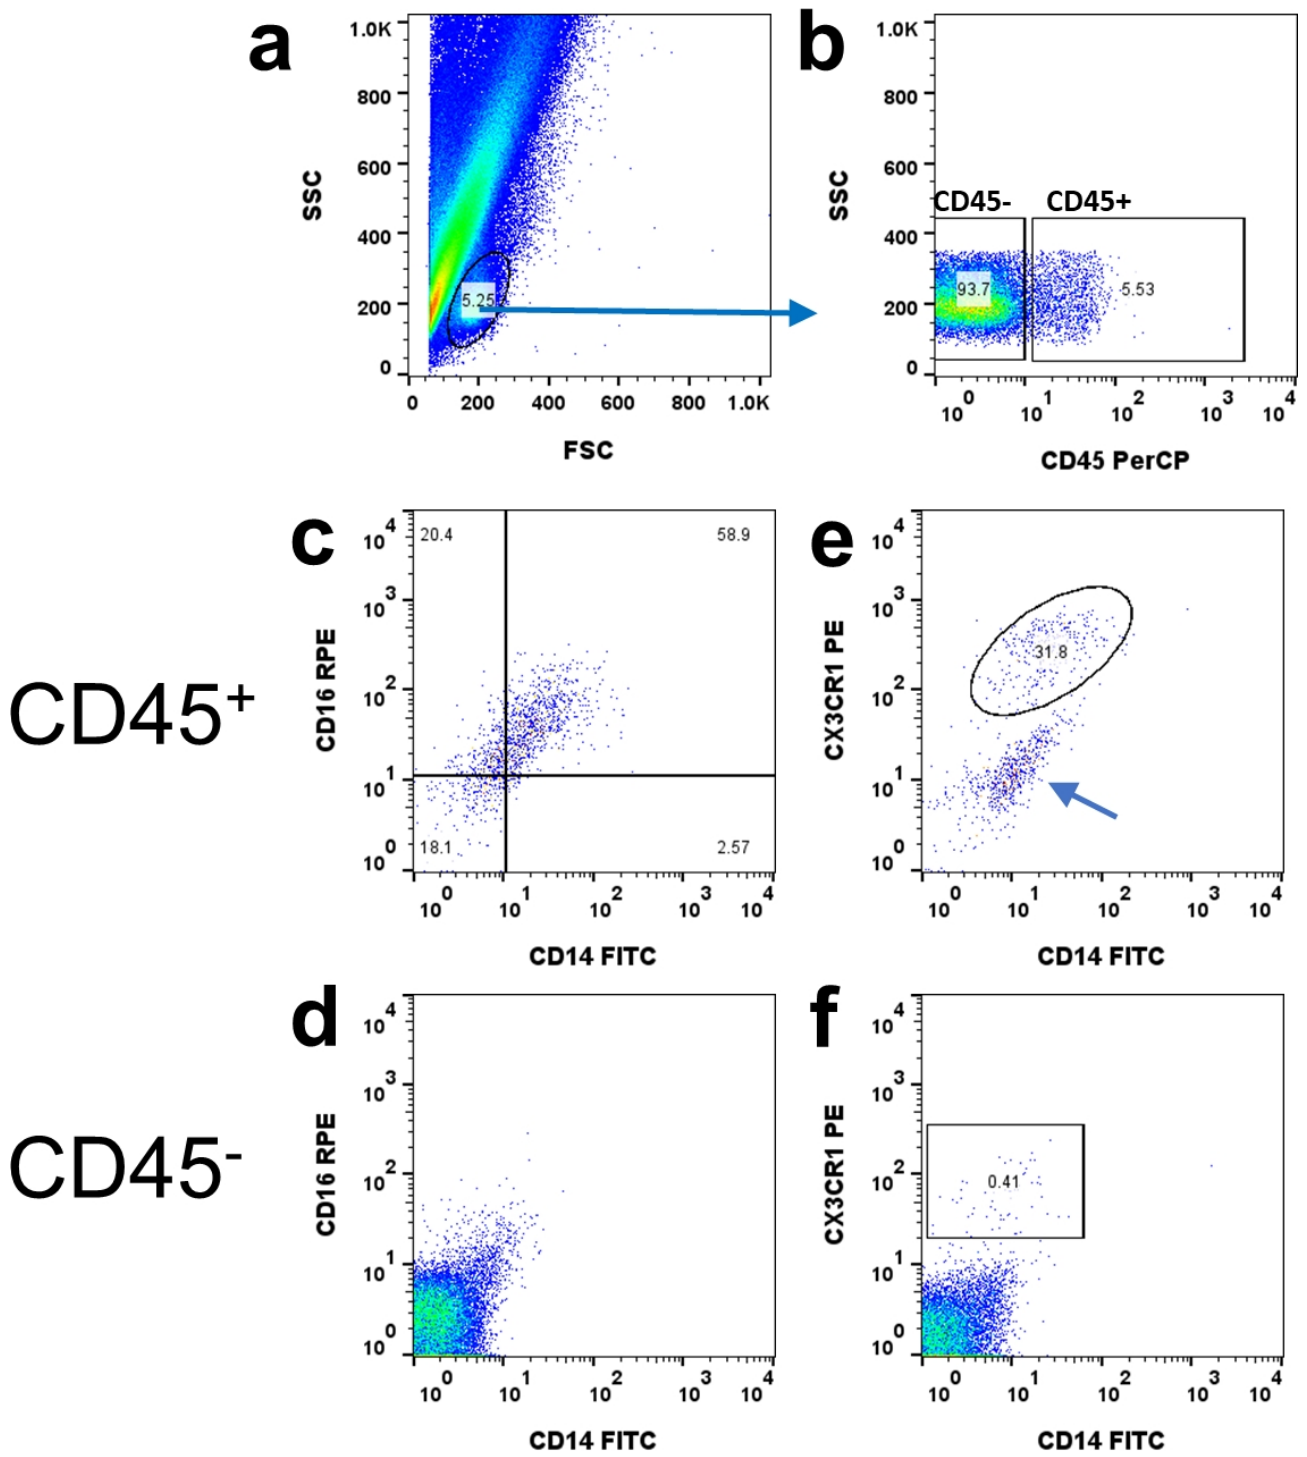

**Suppl. Fig. 17: Characterization of CSF monocyte entry into the brain.** To explore the potential entry of CSF monocytes into the brain, post-mortem brain samples from two motor neuron disease patients were examined (n=3, 1 patient with front cortex and temporal cortex, the other with temporal cortex only). **a-b.** Brain cells were initially discriminated from myelin based on forward and side scatter characteristics, and further categorized according to the fluorescent intensity of CD45. **c.** Initial findings confirmed the presence of CD45<sup>+</sup>CD14<sup>+</sup>CD16<sup>+</sup> monocytes in the examined brain samples. **d.** CD45<sup>-</sup> brain cells were CD14<sup>-</sup>CD16<sup>-</sup>. **e.** Due to high levels of autofluorescence in brain cells (arrow pointed), additional marker such as CX3CR1 was used to distinguish the brain monocytes (circled). **f.** A subset of CD45<sup>-</sup> brain cells expressed CX3CR1, indicating their potential classification as microglia (marked in squares).

Suppl. Fig. 18

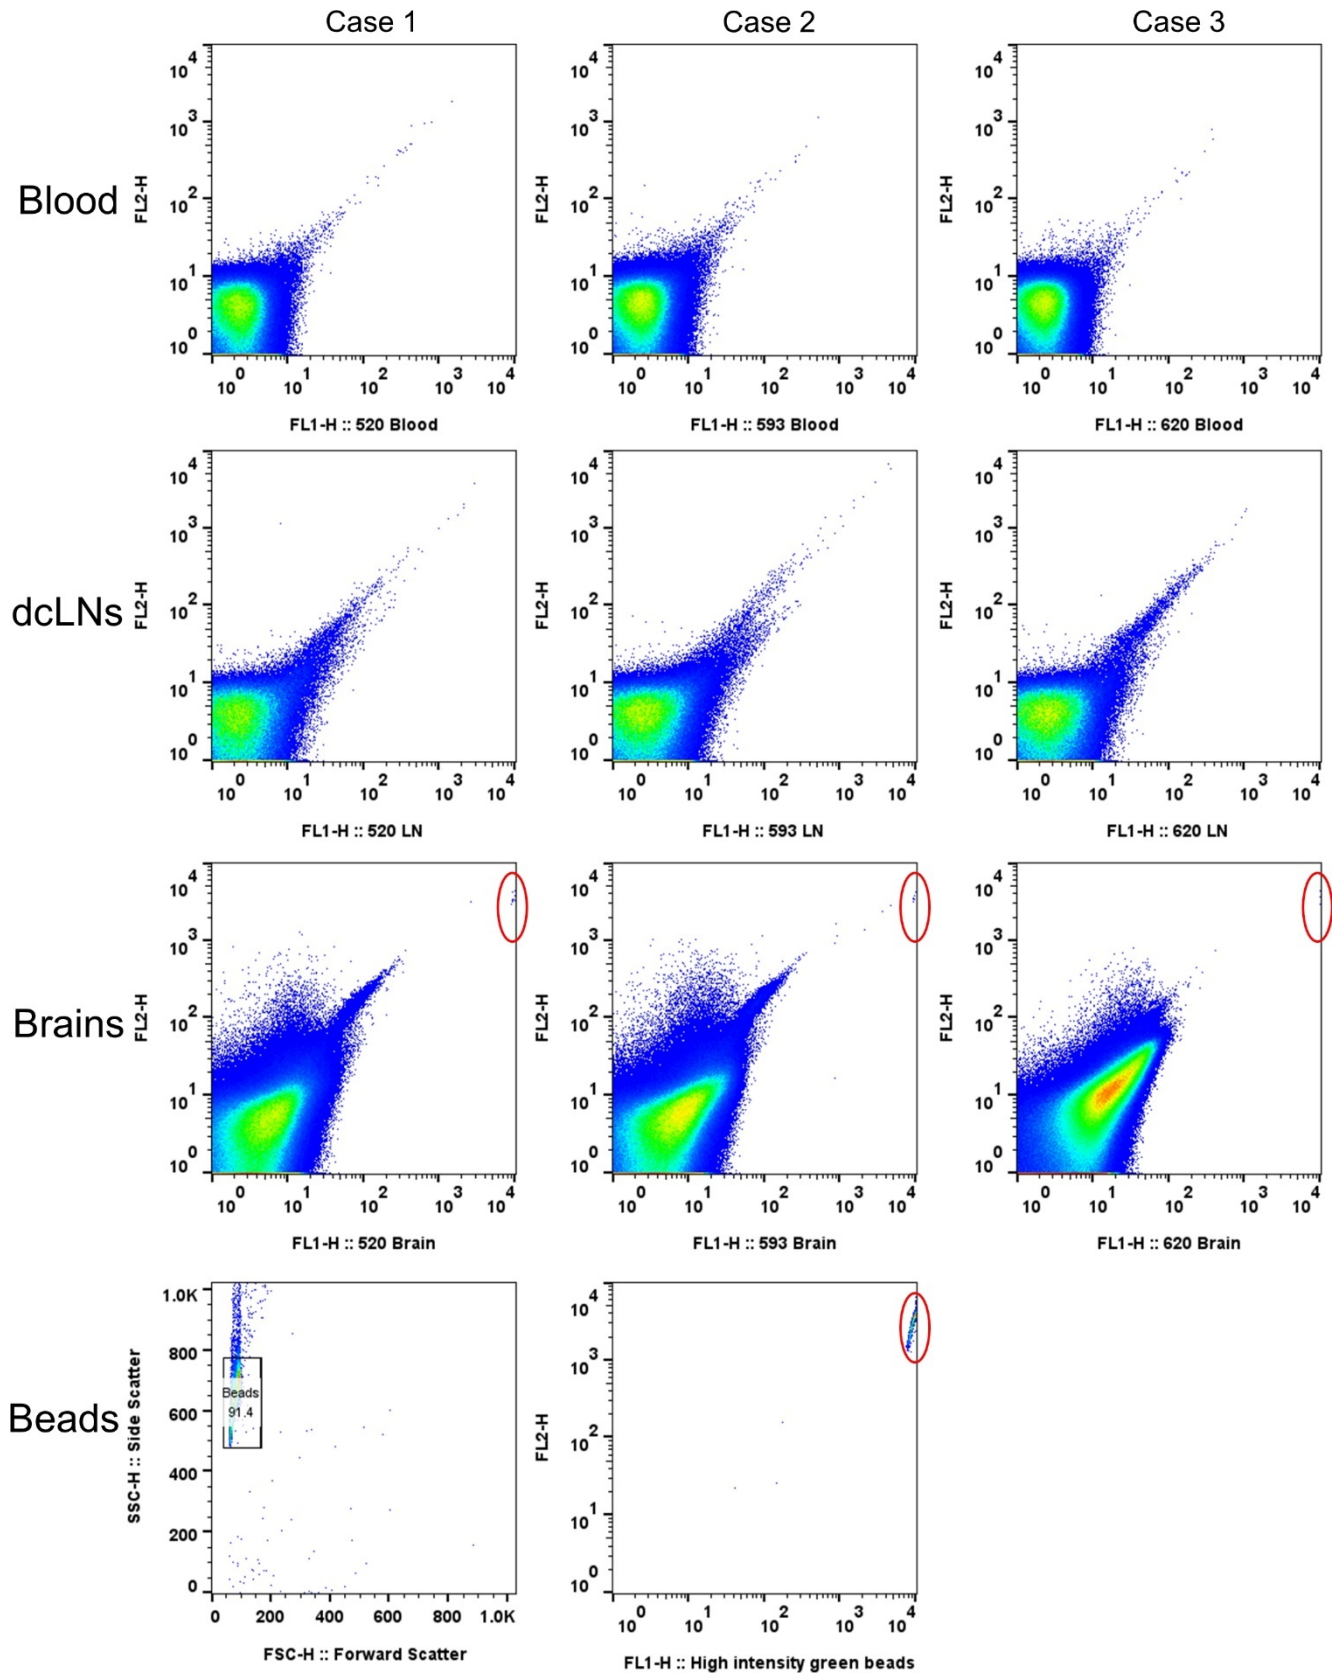

**Suppl. Fig. 18: Validation of Physiological Cell Migration Using Bead Control in APP/PS1 Mice.** 6  $\mu\text{m}$  high-intensity alignment green beads were injected into the lateral ventricle of three APP/PS1 mice as a control study. Two days post-injection, peripheral blood and dcLNs were collected to trace the beads, with no detection in circulation or lymph nodes, confirming physiological cell migration. The beads were analyzed based on forward and side scatter characteristics and further categorized according to the fluorescent intensity.

Uncropped scan 1 for Suppl. Fig. 16

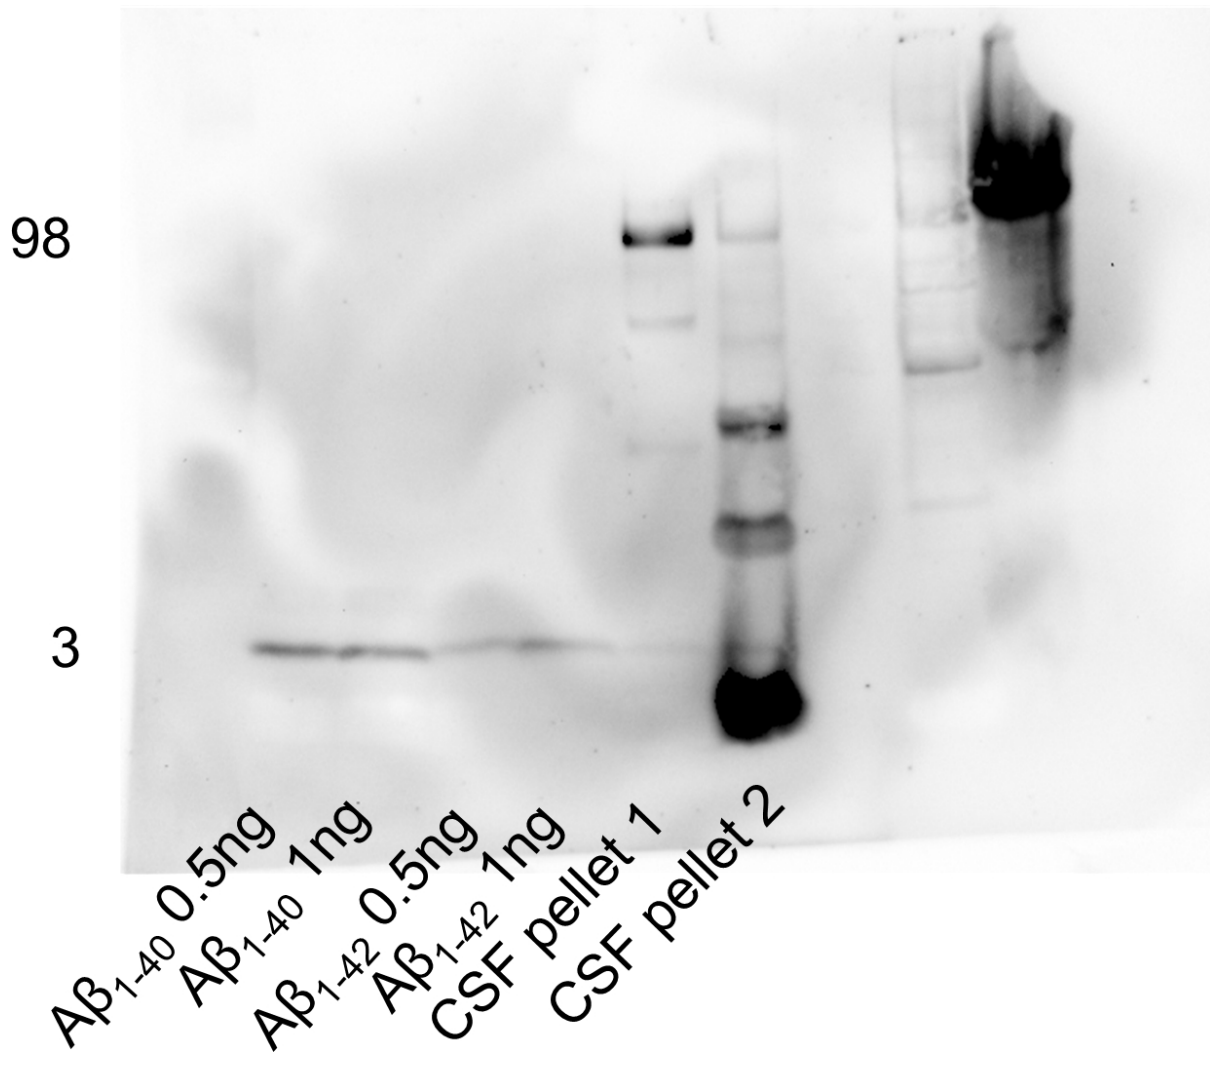

Uncropped scan 2 for Suppl. Fig. 16

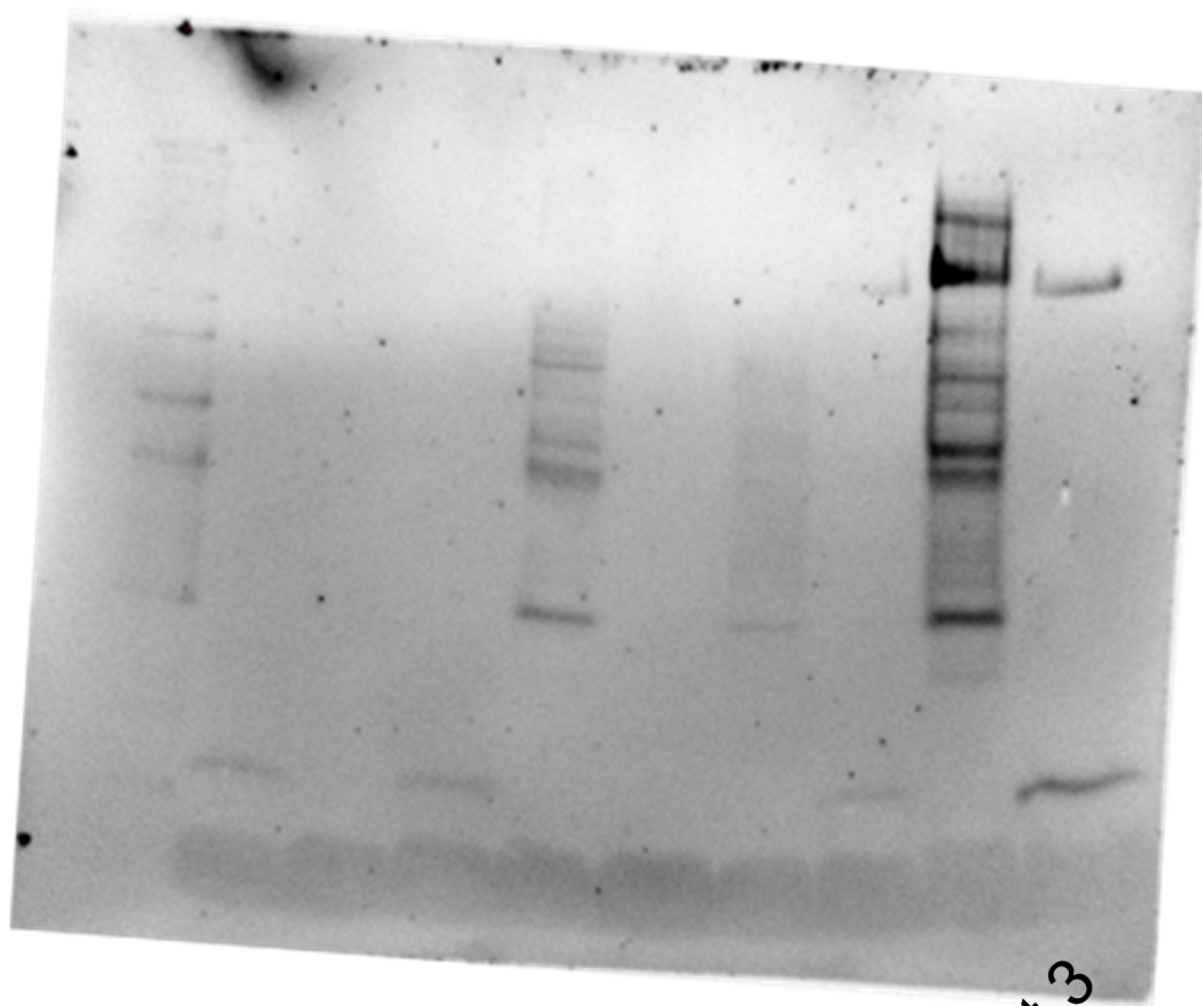

CSF pellet 3

## Part B. Supplementary tables

Suppl. Table 1.

Following intracerebroventricular injection, CFSE-labeled mononuclear cells or CX3CR1+ monocytes were tracked in the peripheral blood and lymph nodes of recipient mice two days later using flow cytometry. The numbers indicate the count of CFSE+ or CX3CR1+ cells, with the total events collected for each sample indicated in parentheses. High-intensity alignment green beads (6  $\mu$ m) were injected into the lateral ventricle of three APP/PS1 mice as a control.

| No. | Donor strain | Date of surgery | Animal ID | Sex | DOB        | Age by cull (week) | LN        | Blood     |
|-----|--------------|-----------------|-----------|-----|------------|--------------------|-----------|-----------|
| 1   | C57BL/6      | 19/02/2023      | 480       | ♀   | 11/11/2022 | 15                 | 42 (666K) | 1 (1.03M) |
| 2   | C57BL/6      | 19/02/2023      | 482       | ♀   | 11/11/2022 | 15                 | 13 (40K)  | 3 (916K)  |
| 3   | C57BL/6      | 05/02/2023      | 465       | ♂   | 10/10/2022 | 17                 |           |           |
| 4   | C57BL/6      | 14/03/2023      | 475       | ♂   | 11/11/2022 | 18                 | 1 (303K)  |           |
| 5   | C57BL/6      | 14/03/2023      | 479       | ♂   | 11/11/2022 | 18                 | 1 (817K)  |           |
| 6   | C57BL/6      | 12/02/2023      | 472       | ♀   | 10/10/2022 | 18                 |           |           |
| 7   | C57BL/6      | 12/02/2023      | 473       | ♀   | 10/10/2022 | 18                 | 5 (869K)  |           |
| 8   | C57BL/6      | 26/03/2023      | 481       | ♀   | 11/11/2022 | 20                 | 5 (131K)  | 10 (1.5M) |
| 9   | C57BL/6      | 05/02/2023      | 328       | ♂   | 11/07/2022 | 30                 |           | 1 (1M)    |
| 10  | C57BL/6      | 07/03/2023      | 92        | ♂   | 21/11/2021 | 68                 | 31 (169K) | 21 (663K) |
| 11  | C57BL/6      | 07/03/2023      | 80        | ♂   | 19/10/2021 | 72                 |           | 4 (560K)  |
| 12  | C57BL/6      | 04/06/2023      | 132       | ♀   | 12/01/2022 | 73                 |           | 2 (573K)  |
| 13  | C57BL/6      | 04/06/2023      | 96        | ♂   | 26/11/2021 | 80                 | 2 (334K)  | 4 (845K)  |
| 14  | Cx3CR1       | 23/09/2023      | 558       | ♂   | 18/01/2023 | 36                 | 4 (76K)   | 1 (295K)  |
| 15  | Cx3CR1       | 14/11/2023      | 559       | ♀   | 18/01/2023 | 43                 | 5 (426K)  | 3 (2.4M)  |
| 16  | Cx3CR1       | 16/09/2023      | 139       | ♂   | 23/03/2022 | 78                 | 12 (212K) | 4 (480K)  |
| 17  | Cx3CR1       | 16/09/2023      | 140       | ♂   | 23/03/2022 | 78                 | 7 (46K)   | 8 (1M)    |
| 18  | Cx3CR1       | 23/09/2023      | 141       | ♂   | 23/03/2022 | 79                 | 8 (242K)  | 5 (345K)  |
| 19  | Beads        | 13/01/2024      | 620       | ♂   | 05/06/2023 | 32                 | 0 (295K)  | 0 (1.5M)  |
| 20  | Beads        | 13/01/2024      | 593       | ♂   | 08/02/2023 | 49                 | 0 (379K)  | 0 (1.5M)  |
| 21  | Beads        | 13/01/2024      | 520       | ♂   | 25/12/2022 | 55                 | 0 (216K)  | 0 (1.5M)  |



Suppl. Table 2.

Comparison of surface A $\beta$  levels and immune cell percentages among CU individuals with high brain A $\beta$ -PET burden. CU individuals were categorized based on brain A $\beta$ -PET status (CU-ve:  $\leq$ 25 CL/CU+ve:  $>$ 25 CL). Part 1 shows the results from the first round of flow cytometry examination of W0-2 and secondary antibody staining, including the percentage of A $\beta$ <sup>++</sup> monocytes and the mean fluorescent intensity of total monocytes in 141 participants (49 CU-ve, 29 CU+ve, 27 MCI+ve and 36 AD-dementia; 9 MCI-ve participants were excluded). Part 2 demonstrates the results from the second round of flow cytometry examination of W0-2 and secondary antibody staining, together with CD14, CD16, CD45 antibodies, including the percentages of NK cells and T&B cells, and monocyte subsets (intermediate, classic, and non-classic monocytes), the percentage of A $\beta$ <sup>++</sup> monocytes in the monocyte subsets, and the mean fluorescent intensity of the monocyte subsets in 108 participants (42 CU-ve, 22 CU+ve, 20 MCI+ve and 24 AD-dementia). Data is presented as Mean  $\pm$  SD.

| <b>Part 1. Tube of W0-2+2nd</b>                                              | <b>CU-ve (n=49)</b> | <b>CU+ve (n=29)</b> | <b>MCI+ve (n=27)</b> | <b>AD-dementia (n=36)</b> |
|------------------------------------------------------------------------------|---------------------|---------------------|----------------------|---------------------------|
| <b>% of A<math>\beta</math><sup>++</sup> Monocytes</b>                       | 1.3 $\pm$ 1         | 1.2 $\pm$ 1.1       | 0.8 $\pm$ 0.7        | 0.6 $\pm$ 0.6             |
| <b>MFI of Monocytes</b>                                                      | 286 $\pm$ 144.3     | 309.2 $\pm$ 155.2   | 214.1 $\pm$ 102.6    | 192.7 $\pm$ 78            |
| <b>Part 2. Tube of W0-2+2nd and CD14, CD16, CD45</b>                         | <b>CU-ve (n=42)</b> | <b>CU+ve (n=22)</b> | <b>MCI+ve (n=20)</b> | <b>AD-dementia (n=24)</b> |
| <b>% of NK cells (CD45<sup>+</sup>CD14<sup>-</sup>CD16<sup>+</sup>)</b>      | 17 $\pm$ 8          | 19.2 $\pm$ 7.8      | 16.9 $\pm$ 5.2       | 12.7 $\pm$ 7.5            |
| <b>% of T&amp;B cells (CD45<sup>+</sup>CD14<sup>-</sup>CD16<sup>-</sup>)</b> | 83 $\pm$ 8          | 80.8 $\pm$ 7.8      | 83.1 $\pm$ 5.2       | 87.3 $\pm$ 7.5            |
| <b>% of Intermediate Monocytes</b>                                           | 7 $\pm$ 4.6         | 7.1 $\pm$ 4.2       | 5.3 $\pm$ 2.1        | 4.9 $\pm$ 2.7             |
| <b>% of A<math>\beta</math><sup>++</sup> Intermediate Monocytes</b>          | 4 $\pm$ 5.2         | 2.5 $\pm$ 3.3       | 1.8 $\pm$ 2.7        | 2.9 $\pm$ 3.9             |
| <b>MFI of Intermediate Monocytes</b>                                         | 475.1 $\pm$ 471     | 356.4 $\pm$ 299.2   | 293.7 $\pm$ 271.7    | 416.4 $\pm$ 352.3         |
| <b>% of Classic Monocytes</b>                                                | 45 $\pm$ 16.9       | 50.7 $\pm$ 14.8     | 49.5 $\pm$ 12.7      | 58.3 $\pm$ 12.3           |
| <b>% of A<math>\beta</math><sup>++</sup> Classic Monocytes</b>               | 0.3 $\pm$ 0.4       | 0.2 $\pm$ 0.2       | 0.1 $\pm$ 0.2        | 0.2 $\pm$ 0.2             |
| <b>MFI of Classic Monocytes</b>                                              | 161.1 $\pm$ 93.6    | 168.7 $\pm$ 111.1   | 129.8 $\pm$ 73.4     | 138.2 $\pm$ 59.4          |
| <b>% of Non-classic Monocytes</b>                                            | 14.3 $\pm$ 6.5      | 13.9 $\pm$ 7.3      | 10.8 $\pm$ 5.7       | 12.9 $\pm$ 6.9            |
| <b>% of A<math>\beta</math><sup>++</sup> Non-classic Monocytes</b>           | 0.5 $\pm$ 1.1       | 0.1 $\pm$ 0.3       | 0.2 $\pm$ 0.5        | 0.1 $\pm$ 0.3             |
| <b>MFI of Non-classic Monocytes</b>                                          | 114 $\pm$ 119.9     | 87.1 $\pm$ 43.4     | 92.4 $\pm$ 72.3      | 101.5 $\pm$ 62.2          |

Suppl. Table 3.

AUCs for different combinations.

| <b>Biomarkers<br/>(CL25)</b>                      | <b>Descriptives</b>                                                    | <b>Goodness<br/>of fit <sup>a</sup></b> | <b>AUC (95% CI)</b>        | <b>Brier<br/>improvement<br/><sup>b</sup></b> |
|---------------------------------------------------|------------------------------------------------------------------------|-----------------------------------------|----------------------------|-----------------------------------------------|
| <b>Baseline</b>                                   | Demographics (Age, Sex, Ed, APOE)                                      | 0.396                                   | 0.808 (CI: 0.721 to 0.895) | NA                                            |
| <b>BM1</b>                                        | MFI of A $\beta$ on monocytes                                          | 0.424                                   | 0.827 (CI: 0.746 to 0.894) | 3.3                                           |
| <b>BM2</b>                                        | MFI of A $\beta$ on A $\beta$ <sup>+</sup> monocytes                   | 0.421                                   | 0.826 (CI: 0.762 to 0.901) | 3.8                                           |
| <b>BM3</b>                                        | Percentage of A $\beta$ <sup>+</sup> monocytes                         | 0.415                                   | 0.828 (CI: 0.748 to 0.892) | 3                                             |
| <b>BM4</b>                                        | Percentage of A $\beta$ <sup>++</sup> monocytes                        | 0.438                                   | 0.836 (CI: 0.761 to 0.899) | 5.1                                           |
| <b>BM5</b>                                        | Percentage of A $\beta$ <sup>+</sup> NK cells                          | 0.477                                   | 0.848 (CI: 0.76 to 0.916)  | 7.1                                           |
| <b>BM6</b>                                        | Percentage of non-classic monocytes                                    | 0.396                                   | 0.818 (CI: 0.737 to 0.891) | -2.5                                          |
| <b>BM7</b>                                        | MFI of A $\beta$ on A $\beta$ <sup>+</sup> non-classic monocytes       | 0.39                                    | 0.816 (CI: 0.697 to 0.885) | -2.7                                          |
| <b>BM8</b>                                        | Percentage of A $\beta$ <sup>++</sup> non-classic monocytes            | 0.418                                   | 0.824 (CI: 0.726 to 0.901) | 0.7                                           |
| <b>BM9</b>                                        | Percentage of intermediate monocytes                                   | 0.418                                   | 0.83 (CI: 0.738 to 0.915)  | 0.3                                           |
| <b>BM10</b>                                       | MFI of A $\beta$ on intermediate monocytes                             | 0.413                                   | 0.828 (CI: 0.743 to 0.908) | 0.2                                           |
| <b>BM11</b>                                       | Percentage of A $\beta$ <sup>+</sup> intermediate monocytes            | 0.437                                   | 0.847 (CI: 0.764 to 0.921) | 3.6                                           |
| <b>BM12</b>                                       | Percentage of A $\beta$ <sup>++</sup> intermediate monocytes           | 0.423                                   | 0.834 (CI: 0.757 to 0.903) | 1.2                                           |
| <b>BM13</b>                                       | Percentage of classic monocytes                                        | 0.441                                   | 0.844 (CI: 0.769 to 0.912) | 3                                             |
| <b>BM14</b>                                       | MFI of A $\beta$ on A $\beta$ <sup>+</sup> classic monocytes           | 0.439                                   | 0.838 (CI: 0.75 to 0.908)  | 4                                             |
| <b>BM15</b>                                       | Percentage of A $\beta$ <sup>++</sup> classical monocytes              | 0.45                                    | 0.838 (CI: 0.749 to 0.905) | 4.8                                           |
| <b>BM16</b>                                       | MFI of A $\beta$ on CD45 <sup>+</sup> A $\beta$ <sup>+</sup> monocytes | 0.457                                   | 0.844 (CI: 0.758 to 0.909) | 5.4                                           |
| <b>BM17</b>                                       | Percentage of CD45 <sup>+</sup> A $\beta$ <sup>++</sup> monocytes      | 0.446                                   | 0.834 (CI: 0.756 to 0.903) | 1.7                                           |
| <b>New<br/>(Demo+BM4+<br/>BM5+BM13+B<br/>M15)</b> |                                                                        | 0.528                                   | 0.871 (CI: 0.803 to 0.938) | 13.5                                          |

We defined disease state simply by Centiloids >25CL for an “overall” assessment. <sup>a</sup>. A Hosmer–Lemeshow goodness of fit was used to test calibration of the model; <sup>b</sup>. The Brier score is the mean squared error of the model and the Brier improvement is the relative improvement of the brier score from the base model, which gives the percent improvement in accuracy with the addition of the biomarker.

Suppl. Table 4.

AUCs for single markers.

| <b>Biomarkers<br/>(CL25)</b> | <b>Descriptives</b>                                         | <b>AUC</b> |
|------------------------------|-------------------------------------------------------------|------------|
| <b>BM1</b>                   | MFI of A $\beta$ on monocytes                               | 0.587      |
| <b>BM2</b>                   | MFI of A $\beta$ on A $\beta^+$ monocytes                   | 0.568      |
| <b>BM3</b>                   | Percentage of A $\beta^+$ monocytes                         | 0.581      |
| <b>BM4</b>                   | Percentage of A $\beta^{++}$ monocytes                      | 0.639      |
| <b>BM5</b>                   | Percentage of A $\beta^+$ NK cells                          | 0.653      |
| <b>BM6</b>                   | Percentage of non-classic monocytes                         | 0.627      |
| <b>BM7</b>                   | MFI of A $\beta$ on A $\beta^+$ non-classic monocytes       | 0.599      |
| <b>BM8</b>                   | Percentage of A $\beta^{++}$ non-classic monocytes          | 0.556      |
| <b>BM9</b>                   | Percentage of intermediate monocytes                        | 0.592      |
| <b>BM10</b>                  | MFI of A $\beta$ on intermediate monocytes                  | 0.613      |
| <b>BM11</b>                  | Percentage of A $\beta^+$ intermediate monocytes            | 0.668      |
| <b>BM12</b>                  | Percentage of A $\beta^{++}$ intermediate monocytes         | 0.635      |
| <b>BM13</b>                  | Percentage of classic monocytes                             | 0.637      |
| <b>BM14</b>                  | MFI of A $\beta$ on A $\beta^+$ classic monocytes           | 0.654      |
| <b>BM15</b>                  | Percentage of A $\beta^{++}$ classical monocytes            | 0.619      |
| <b>BM16</b>                  | MFI of A $\beta$ on CD45 <sup>+</sup> A $\beta^+$ monocytes | 0.678      |
| <b>BM17</b>                  | Percentage of CD45 <sup>+</sup> A $\beta^{++}$ monocytes    | 0.683      |

We defined disease state simply by Centiloids >25CL for an “overall” assessment.

### Part C. Flow cytometry gating strategy

In the Methods section, we described “The flow cytometry-based assay”. The flow cytometry gating strategy can be found in Suppl. Fig. 3 (gating on forward scatter (FSC) and side scatter (SSC)),

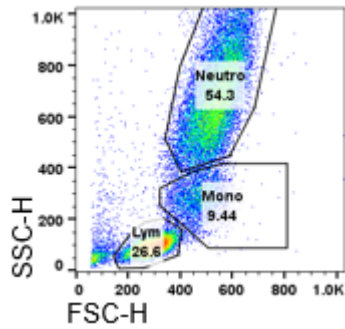

and Fig. 1 (gating on CD14 and CD16).

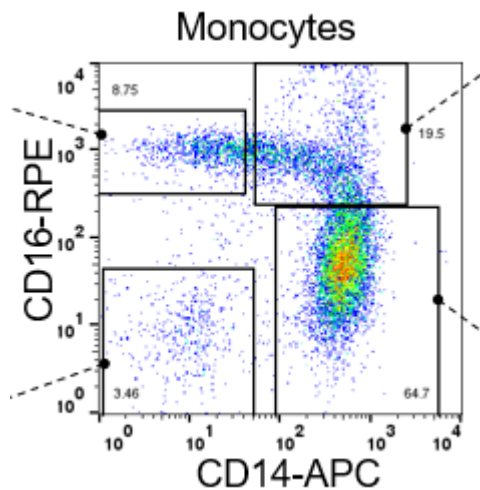

Monocytes are gated based on FSC/SSC in Fig. 4, and monocytic subsets are gated based on CD14 and CD16 in Suppl. Fig. 4.

The quantitative gating (Fig. 5, & Suppl. Fig. 7,8,9) can be found in the figures below:

For the single-color panel (1C) lymphocytes, L0-1.2 is W0-2 negative, L1.2-4 is W0-2 positive.

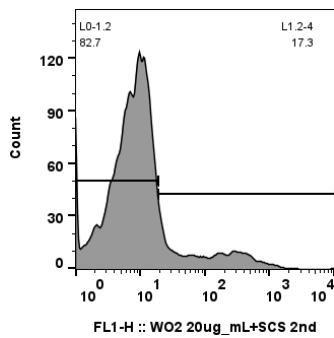

L1.2-4 is W0-2 positive.

For 1C monocytes, M0-2 is W0-2 negative, M2-4 is W0-2 positive, and M3.6-4 is W0-2 highly positive. The M3-4 is a test gating for W0-2 highly positive.

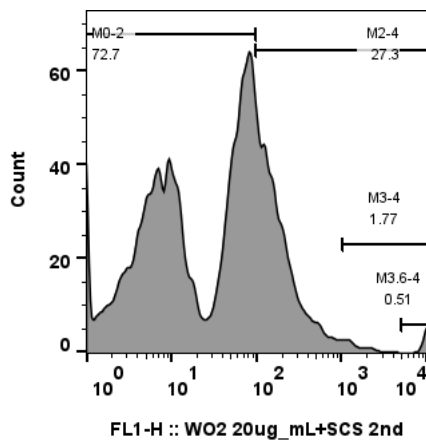

For the four-color panel (4C), CD45<sup>+</sup> cells are gated first,

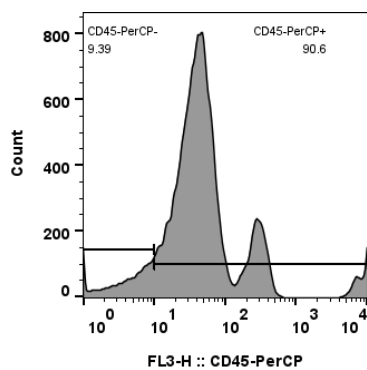

lymphocytes, and monocytes are then gated based on FSC/SSC,

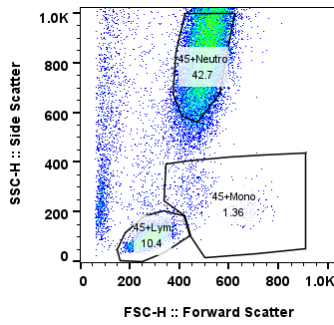

lymphocytes are then cleaned using CD14<sup>-</sup> gating and separated into NK cells and T&B cells using CD16 gating; monocytes are separated into non-classic, intermediate, and classic monocytes using CD14 and CD16 gating.

Fig. 6 illustrates the gating strategy for the CSF lymphocytes and monocytes.

Fig. 7 shows gating strategy for tracking injected monocytes in AD model mice.

Monocytes are gated based on FSC/SSC, and monocytic subsets are gated based on CD14 and CD16 in Suppl. Fig. 1.

Suppl. Fig. 5 depicts the gating strategy for the three-color real-time phagocytosis assay.

Cells are gated based on FSC/SSC, and are further gated by pHrodo-Abeta and AF647-Aducanumab in Suppl. Fig. 6a-b.

Monocytes are gated based on FSC/FSC, and further gated either based on pHrodo-Abeta/AF647-Aducanumab or CD14/CD16 in Suppl. Fig. 6c.

Cells are gated based on FSC/SSC, CD45, and CD14/CX3CR1 as shown in Suppl. Fig. 11.

In Suppl. Fig. 12, blood cells, deep lymph node cells, and brain cells are gated based on FSC/SSC, and further gated based on FL1-H and FL2-H. Beads are gated on FSC/SSC and are shown in FL1-H and FL2-H.

## Part D. Antibody list for the study

22C11 (SigmaAldrich#MAB348)

4G8 made in house

6E10 made in house

AF488 goat anti-mouse IgG2a (Life Tech#A-21131)

AF647 CCR2 (BD# 558406)

AF647 CD163 (BD#562669)

AF647 CD35 (BD# 565329)

AF647 CD85A (BD#564469)

AF647 CD85D (BD#564345)

AF647 goat anti-mouse IgG2a (Life Tech#A-21241)

AF647 P2X7R (clone L4) made in house

CD11b-PE (BD#555388)

CD11c-APC (BD#559877)

CD14-APC (BD#340436)

CD16-PE (Dako#R7012)

CD33-PE (BD#347787)

CD45-PerCP (BD#347464)

CD4-PE (BD#555347)

CD68-FITC (BD#562117)

CD8-FITC (BD#555366)

CD91-PE (BD# 550497)

CX3CR1-PE (BD# 565796)

HLA-DR PE (BD#347367)

Lin1-FITC (BD#340546)

MerTK-APC (R&D#FAB8912A)

TREM2-APC(R&D#FAB17291A)

W0-2 made in house
